# Supplementary material for: Single cell transcriptome analysis of MCF-7 reveals consistently and inconsistently expressed gene groups each associated with distinct cellular localization and functions
Source: PubMed Central journal article supplement (PMC6007910; doi:10.1371/journal.pone.0199471), 2018-06-19
Supplement: pone.0199471.s002.pdf [file pone.0199471.s002.pdf]

**Supplementary Table S2:  
GO analysis for CE and IE genes**

**CE.1) Consistently Expressed Genes: Cellular Component**

| GOID       | GO<br>#gene | CE<br>#gene | p-value  | GOterm                                       |
|------------|-------------|-------------|----------|----------------------------------------------|
| GO:0044424 | 8679        | 6073        | 1.24E-92 | intracellular part                           |
| GO:0005622 | 8875        | 6181        | 7.25E-90 | intracellular                                |
| GO:0043227 | 6814        | 4900        | 6.92E-81 | membrane-bounded organelle                   |
| GO:0043231 | 6809        | 4895        | 2.91E-80 | intracellular membrane-bounded organelle     |
| GO:0043226 | 7463        | 5288        | 1.73E-74 | organelle                                    |
| GO:0043229 | 7456        | 5283        | 2.85E-74 | intracellular organelle                      |
| GO:0044446 | 4610        | 3443        | 2.84E-73 | intracellular organelle part                 |
| GO:0044422 | 4648        | 3464        | 7.43E-72 | organelle part                               |
| GO:0005737 | 6372        | 4560        | 2.16E-62 | cytoplasm                                    |
| GO:0070013 | 2246        | 1767        | 5.98E-55 | intracellular organelle lumen                |
| GO:0031974 | 2299        | 1802        | 4.27E-54 | membrane-enclosed lumen                      |
| GO:0043233 | 2269        | 1777        | 9.95E-53 | organelle lumen                              |
| GO:0044444 | 4619        | 3380        | 1.55E-52 | cytoplasmic part                             |
| GO:0044428 | 2166        | 1693        | 9.51E-49 | nuclear part                                 |
| GO:0030529 | 489         | 451         | 7.87E-47 | ribonucleoprotein complex                    |
| GO:0005739 | 1148        | 947         | 5.53E-43 | mitochondrion                                |
| GO:0031981 | 1915        | 1491        | 2.44E-40 | nuclear lumen                                |
| GO:0032991 | 2695        | 2019        | 3.56E-36 | macromolecular complex                       |
| GO:0044429 | 598         | 516         | 3.24E-33 | mitochondrial part                           |
| GO:0005634 | 4313        | 3090        | 1.78E-31 | nucleus                                      |
| GO:0005730 | 981         | 784         | 1.78E-26 | nucleolus                                    |
| GO:0031967 | 616         | 516         | 2.43E-26 | organelle envelope                           |
| GO:0005840 | 193         | 184         | 1.84E-24 | ribosome                                     |
| GO:0031975 | 623         | 517         | 1.94E-24 | envelope                                     |
| GO:0005829 | 1644        | 1243        | 2.27E-23 | cytosol                                      |
| GO:0005654 | 1127        | 879         | 2.84E-23 | nucleoplasm                                  |
| GO:0043228 | 2483        | 1816        | 2.21E-22 | non-membrane-bounded organelle               |
| GO:0043232 | 2483        | 1816        | 2.21E-22 | intracellular non-membrane-bounded organelle |
| GO:0005740 | 407         | 349         | 1.25E-21 | mitochondrial envelope                       |
| GO:0005623 | 10509       | 6938        | 1.65E-20 | cell                                         |
| GO:0044464 | 10509       | 6938        | 1.65E-20 | cell part                                    |
| GO:0031966 | 389         | 333         | 2.01E-20 | mitochondrial membrane                       |
| GO:0031090 | 1630        | 1212        | 2.98E-18 | organelle membrane                           |
| GO:0005743 | 276         | 242         | 5.49E-18 | mitochondrial inner membrane                 |
| GO:0019866 | 301         | 260         | 2.75E-17 | organelle inner membrane                     |
| GO:0005759 | 241         | 212         | 2.87E-16 | mitochondrial matrix                         |
| GO:0044445 | 137         | 128         | 3.26E-15 | cytosolic part                               |
| GO:0044451 | 618         | 488         | 7.81E-15 | nucleoplasm part                             |
| GO:0016604 | 208         | 183         | 3.15E-14 | nuclear body                                 |
| GO:0005681 | 135         | 125         | 4.75E-14 | spliceosomal complex                         |
| GO:0043234 | 2190        | 1566        | 7.26E-13 | protein complex                              |
| GO:0016607 | 114         | 106         | 2.02E-12 | nuclear speck                                |
| GO:0044455 | 118         | 109         | 3.19E-12 | mitochondrial membrane part                  |
| GO:0022626 | 75          | 73          | 7.89E-12 | cytosolic ribosome                           |
| GO:0015934 | 63          | 62          | 5.80E-11 | large ribosomal subunit                      |
| GO:0070469 | 63          | 62          | 5.80E-11 | respiratory chain                            |
| GO:0005746 | 58          | 57          | 4.64E-10 | mitochondrial respiratory chain              |
| GO:0015935 | 57          | 56          | 7.02E-10 | small ribosomal subunit                      |
| GO:0000502 | 59          | 57          | 4.96E-09 | proteasome complex                           |
| GO:0010008 | 205         | 170         | 9.11E-09 | endosome membrane                            |

|            |      |     |          |                                                        |
|------------|------|-----|----------|--------------------------------------------------------|
| GO:0044440 | 205  | 170 | 9.11E-09 | endosomal part                                         |
| GO:0005747 | 39   | 39  | 5.21E-08 | mitochondrial respiratory chain complex I              |
| GO:0030964 | 39   | 39  | 5.21E-08 | NADH dehydrogenase complex                             |
| GO:0045271 | 39   | 39  | 5.21E-08 | respiratory chain complex I                            |
| GO:0022625 | 37   | 37  | 1.23E-07 | cytosolic large ribosomal subunit                      |
| GO:0005768 | 335  | 261 | 1.64E-07 | endosome                                               |
| GO:0000313 | 49   | 47  | 2.58E-07 | organellar ribosome                                    |
| GO:0005761 | 49   | 47  | 2.58E-07 | mitochondrial ribosome                                 |
| GO:0005635 | 216  | 174 | 3.67E-07 | nuclear envelope                                       |
| GO:0035097 | 58   | 54  | 5.94E-07 | histone methyltransferase complex                      |
| GO:0005694 | 466  | 349 | 2.25E-06 | chromosome                                             |
| GO:0034708 | 59   | 54  | 2.55E-06 | methyltransferase complex                              |
| GO:0042470 | 82   | 72  | 2.71E-06 | melanosome                                             |
| GO:0048770 | 82   | 72  | 2.71E-06 | pigment granule                                        |
| GO:0008287 | 41   | 39  | 5.74E-06 | protein serine/threonine phosphatase complex           |
| GO:0022627 | 35   | 34  | 5.79E-06 | cytosolic small ribosomal subunit                      |
| GO:0000785 | 194  | 153 | 1.81E-05 | chromatin                                              |
| GO:0005643 | 67   | 59  | 1.82E-05 | nuclear pore                                           |
| GO:0044427 | 390  | 291 | 2.59E-05 | chromosomal part                                       |
| GO:0015030 | 42   | 39  | 2.96E-05 | Cajal body                                             |
| GO:0046930 | 76   | 65  | 5.59E-05 | pore complex                                           |
| GO:0031965 | 128  | 103 | 9.66E-05 | nuclear membrane                                       |
| GO:0012505 | 1179 | 823 | 1.72E-04 | endomembrane system                                    |
| GO:0045259 | 20   | 20  | 1.86E-04 | proton-transporting ATP synthase complex               |
| GO:0000123 | 66   | 56  | 2.90E-04 | histone acetyltransferase complex                      |
| GO:0000790 | 70   | 59  | 2.92E-04 | nuclear chromatin                                      |
| GO:0016585 | 89   | 73  | 3.30E-04 | chromatin remodeling complex                           |
| GO:0005793 | 48   | 42  | 4.28E-04 | ER-Golgi intermediate compartment                      |
| GO:0000314 | 18   | 18  | 4.39E-04 | organellar small ribosomal subunit                     |
| GO:0005753 | 18   | 18  | 4.39E-04 | mitochondrial proton-transporting ATP synthase complex |
| GO:0005763 | 18   | 18  | 4.39E-04 | mitochondrial small ribosomal subunit                  |
| GO:0030530 | 18   | 18  | 4.39E-04 | heterogeneous nuclear ribonucleoprotein complex        |
| GO:0033116 | 18   | 18  | 4.39E-04 | ER-Golgi intermediate compartment membrane             |
| GO:0009295 | 34   | 31  | 5.00E-04 | nucleoid                                               |
| GO:0005741 | 91   | 74  | 5.03E-04 | mitochondrial outer membrane                           |
| GO:0031901 | 43   | 38  | 5.22E-04 | early endosome membrane                                |
| GO:0042645 | 33   | 30  | 7.06E-04 | mitochondrial nucleoid                                 |
| GO:0000228 | 183  | 139 | 9.50E-04 | nuclear chromosome                                     |
| GO:0005769 | 117  | 92  | 9.96E-04 | early endosome                                         |
| GO:0005625 | 226  | 169 | 1.04E-03 | soluble fraction                                       |
| GO:0031968 | 106  | 84  | 1.05E-03 | organelle outer membrane                               |
| GO:0016469 | 40   | 35  | 1.33E-03 | proton-transporting two-sector ATPase complex          |
| GO:0048471 | 276  | 203 | 1.48E-03 | perinuclear region of cytoplasm                        |
| GO:0030684 | 15   | 15  | 1.59E-03 | preribosome                                            |
| GO:0044454 | 149  | 114 | 1.69E-03 | nuclear chromosome part                                |
| GO:0030532 | 30   | 27  | 1.95E-03 | small nuclear ribonucleoprotein complex                |
| GO:0019867 | 110  | 86  | 1.98E-03 | outer membrane                                         |
| GO:0005794 | 767  | 536 | 2.10E-03 | Golgi apparatus                                        |
| GO:0005852 | 14   | 14  | 2.45E-03 | eukaryotic translation initiation factor 3 complex     |
| GO:0005689 | 24   | 22  | 3.11E-03 | U12-type spliceosomal complex                          |
| GO:0000792 | 41   | 35  | 3.38E-03 | heterochromatin                                        |
| GO:0016591 | 75   | 60  | 3.57E-03 | DNA-directed RNA polymerase II, holoenzyme             |
| GO:0071339 | 28   | 25  | 3.77E-03 | MLL1 complex                                           |
| GO:0044432 | 570  | 400 | 4.86E-03 | endoplasmic reticulum part                             |
| GO:0005720 | 27   | 24  | 5.23E-03 | nuclear heterochromatin                                |
| GO:0005788 | 73   | 58  | 5.52E-03 | endoplasmic reticulum lumen                            |
| GO:0022624 | 12   | 12  | 5.79E-03 | proteasome accessory complex                           |
| GO:0030867 | 12   | 12  | 5.79E-03 | rough endoplasmic reticulum membrane                   |

|            |     |     |          |                                                                |
|------------|-----|-----|----------|----------------------------------------------------------------|
| GO:0030897 | 12  | 12  | 5.79E-03 | HOPS complex                                                   |
| GO:0045263 | 12  | 12  | 5.79E-03 | proton-transporting ATP synthase complex, coupling factor F(o) |
| GO:0044431 | 468 | 330 | 6.53E-03 | Golgi apparatus part                                           |
| GO:0000315 | 17  | 16  | 6.84E-03 | organellar large ribosomal subunit                             |
| GO:0005762 | 17  | 16  | 6.84E-03 | mitochondrial large ribosomal subunit                          |
| GO:0005839 | 17  | 16  | 6.84E-03 | proteasome core complex                                        |
| GO:0030135 | 147 | 110 | 7.09E-03 | coated vesicle                                                 |
| GO:0044452 | 26  | 23  | 7.21E-03 | nucleolar part                                                 |
| GO:0005758 | 34  | 29  | 7.87E-03 | mitochondrial intermembrane space                              |
| GO:0005783 | 816 | 563 | 8.24E-03 | endoplasmic reticulum                                          |
| GO:0000151 | 136 | 102 | 8.33E-03 | ubiquitin ligase complex                                       |
| GO:0000782 | 11  | 11  | 8.89E-03 | telomere cap complex                                           |
| GO:0000783 | 11  | 11  | 8.89E-03 | nuclear telomere cap complex                                   |
| GO:0005744 | 11  | 11  | 8.89E-03 | mitochondrial inner membrane presequence translocase complex   |

## CE.2) Consistently Expressed Genes: Biological Process

| GOID       | GO #gene | CE #gene | p-value  | GOterm                                                                               |
|------------|----------|----------|----------|--------------------------------------------------------------------------------------|
| GO:0006412 | 394      | 364      | 1.36E-37 | translation                                                                          |
| GO:0006396 | 573      | 496      | 6.45E-32 | RNA processing                                                                       |
| GO:0044267 | 2196     | 1654     | 2.78E-29 | cellular protein metabolic process                                                   |
| GO:0016071 | 472      | 410      | 3.77E-27 | mRNA metabolic process                                                               |
| GO:0044237 | 6144     | 4271     | 6.03E-27 | cellular metabolic process                                                           |
| GO:0008380 | 286      | 259      | 1.74E-23 | RNA splicing                                                                         |
| GO:0044260 | 4719     | 3323     | 4.31E-23 | cellular macromolecule metabolic process                                             |
| GO:0046907 | 694      | 562      | 9.65E-21 | intracellular transport                                                              |
| GO:0019538 | 2435     | 1781     | 1.20E-20 | protein metabolic process                                                            |
| GO:0006397 | 351      | 305      | 1.86E-20 | mRNA processing                                                                      |
| GO:0008152 | 6686     | 4577     | 4.21E-19 | metabolic process                                                                    |
| GO:0044265 | 458      | 382      | 1.89E-18 | cellular macromolecule catabolic process                                             |
| GO:0009057 | 546      | 447      | 2.56E-18 | macromolecule catabolic process                                                      |
| GO:0000375 | 167      | 156      | 6.26E-18 | RNA splicing, via transesterification reactions                                      |
| GO:0043170 | 4997     | 3471     | 3.13E-17 | macromolecule metabolic process                                                      |
| GO:0000377 | 162      | 151      | 3.83E-17 | RNA splicing, via transesterification reactions with bulged adenosine as nucleophile |
| GO:0000398 | 162      | 151      | 3.83E-17 | nuclear mRNA splicing, via spliceosome                                               |
| GO:0010467 | 3073     | 2192     | 8.65E-17 | gene expression                                                                      |
| GO:0044238 | 6083     | 4175     | 8.85E-17 | primary metabolic process                                                            |
| GO:0022415 | 205      | 184      | 5.21E-16 | viral reproductive process                                                           |
| GO:0019080 | 137      | 129      | 7.85E-16 | viral genome expression                                                              |
| GO:0019083 | 137      | 129      | 7.85E-16 | viral transcription                                                                  |
| GO:0010608 | 230      | 203      | 1.28E-15 | posttranscriptional regulation of gene expression                                    |
| GO:0016032 | 372      | 311      | 1.70E-15 | viral reproduction                                                                   |
| GO:0071843 | 205      | 183      | 2.38E-15 | cellular component biogenesis at cellular level                                      |
| GO:0022613 | 195      | 175      | 2.85E-15 | ribonucleoprotein complex biogenesis                                                 |
| GO:0019058 | 184      | 166      | 4.52E-15 | viral infectious cycle                                                               |
| GO:0022904 | 90       | 88       | 2.77E-14 | respiratory electron transport chain                                                 |
| GO:0045184 | 807      | 622      | 6.72E-14 | establishment of protein localization                                                |
| GO:0034660 | 255      | 219      | 8.77E-14 | ncRNA metabolic process                                                              |
| GO:0070647 | 375      | 309      | 1.08E-13 | protein modification by small protein conjugation or removal                         |
| GO:0006414 | 105      | 100      | 1.75E-13 | translational elongation                                                             |
| GO:0015031 | 790      | 608      | 2.23E-13 | protein transport                                                                    |
| GO:0090304 | 3154     | 2223     | 4.01E-13 | nucleic acid metabolic process                                                       |
| GO:0032446 | 332      | 275      | 7.53E-13 | protein modification by small protein conjugation                                    |

|            |      |      |          |                                                                       |
|------------|------|------|----------|-----------------------------------------------------------------------|
| GO:0006417 | 144  | 131  | 7.85E-13 | regulation of translation                                             |
| GO:0034641 | 3973 | 2765 | 1.06E-12 | cellular nitrogen compound metabolic process                          |
| GO:0045333 | 122  | 113  | 1.32E-12 | cellular respiration                                                  |
| GO:0006415 | 93   | 89   | 1.66E-12 | translational termination                                             |
| GO:0051246 | 579  | 454  | 2.04E-12 | regulation of protein metabolic process                               |
| GO:0016567 | 311  | 258  | 2.80E-12 | protein ubiquitination                                                |
| GO:0008104 | 954  | 719  | 3.09E-12 | protein localization                                                  |
| GO:0019941 | 290  | 242  | 3.82E-12 | modification-dependent protein catabolic process                      |
| GO:0043632 | 290  | 242  | 3.82E-12 | modification-dependent macromolecule catabolic process                |
| GO:0044248 | 1055 | 788  | 6.92E-12 | cellular catabolic process                                            |
| GO:0006807 | 4032 | 2797 | 9.09E-12 | nitrogen compound metabolic process                                   |
| GO:0009056 | 1225 | 905  | 1.14E-11 | catabolic process                                                     |
| GO:0006511 | 285  | 237  | 1.34E-11 | ubiquitin-dependent protein catabolic process                         |
| GO:0006139 | 3705 | 2578 | 1.82E-11 | nucleobase, nucleoside, nucleotide and nucleic acid metabolic process |
| GO:0030163 | 348  | 283  | 2.52E-11 | protein catabolic process                                             |
| GO:0071841 | 2179 | 1555 | 2.56E-11 | cellular component organization or biogenesis at cellular level       |
| GO:0006996 | 1389 | 1016 | 2.94E-11 | organelle organization                                                |
| GO:0051603 | 297  | 245  | 3.31E-11 | proteolysis involved in cellular protein catabolic process            |
| GO:0006403 | 117  | 107  | 4.53E-11 | RNA localization                                                      |
| GO:0033036 | 1143 | 845  | 4.97E-11 | macromolecule localization                                            |
| GO:0006405 | 64   | 63   | 5.44E-11 | RNA export from nucleus                                               |
| GO:0050657 | 116  | 106  | 6.37E-11 | nucleic acid transport                                                |
| GO:0050658 | 116  | 106  | 6.37E-11 | RNA transport                                                         |
| GO:0051236 | 116  | 106  | 6.37E-11 | establishment of RNA localization                                     |
| GO:0044257 | 302  | 248  | 6.38E-11 | cellular protein catabolic process                                    |
| GO:0051168 | 89   | 84   | 7.17E-11 | nuclear export                                                        |
| GO:0022900 | 119  | 108  | 1.24E-10 | electron transport chain                                              |
| GO:0042254 | 128  | 115  | 1.55E-10 | ribosome biogenesis                                                   |
| GO:0043933 | 753  | 570  | 2.12E-10 | macromolecular complex subunit organization                           |
| GO:0034621 | 517  | 402  | 3.25E-10 | cellular macromolecular complex subunit organization                  |
| GO:0006119 | 51   | 51   | 3.96E-10 | oxidative phosphorylation                                             |
| GO:0044249 | 3515 | 2441 | 4.20E-10 | cellular biosynthetic process                                         |
| GO:0032268 | 519  | 403  | 4.29E-10 | regulation of cellular protein metabolic process                      |
| GO:0006974 | 455  | 357  | 4.63E-10 | response to DNA damage stimulus                                       |
| GO:0033554 | 727  | 550  | 5.34E-10 | cellular response to stress                                           |
| GO:0071840 | 2678 | 1881 | 6.58E-10 | cellular component organization or biogenesis                         |
| GO:0051028 | 104  | 95   | 6.80E-10 | mRNA transport                                                        |
| GO:0048193 | 137  | 121  | 7.32E-10 | Golgi vesicle transport                                               |
| GO:0015931 | 132  | 117  | 8.39E-10 | nucleobase, nucleoside, nucleotide and nucleic acid transport         |
| GO:0009058 | 3572 | 2476 | 9.25E-10 | biosynthetic process                                                  |
| GO:0006413 | 64   | 62   | 9.40E-10 | translational initiation                                              |
| GO:0006886 | 386  | 306  | 1.09E-09 | intracellular protein transport                                       |
| GO:0006913 | 215  | 180  | 1.36E-09 | nucleocytoplasmic transport                                           |
| GO:0043161 | 174  | 149  | 1.38E-09 | proteasomal ubiquitin-dependent protein catabolic process             |
| GO:0034470 | 186  | 158  | 1.58E-09 | ncRNA processing                                                      |
| GO:0006406 | 55   | 54   | 2.18E-09 | mRNA export from nucleus                                              |
| GO:0051169 | 217  | 181  | 2.26E-09 | nuclear transport                                                     |
| GO:0042773 | 46   | 46   | 3.33E-09 | ATP synthesis coupled electron transport                              |
| GO:0042775 | 46   | 46   | 3.33E-09 | mitochondrial ATP synthesis coupled electron transport                |
| GO:0034645 | 2912 | 2031 | 4.38E-09 | cellular macromolecule biosynthetic process                           |
| GO:0010498 | 178  | 151  | 4.46E-09 | proteasomal protein catabolic process                                 |
| GO:0071842 | 2088 | 1475 | 1.11E-08 | cellular component organization at cellular level                     |
| GO:0009059 | 2945 | 2048 | 1.72E-08 | macromolecule biosynthetic process                                    |
| GO:0006457 | 191  | 159  | 2.85E-08 | protein folding                                                       |
| GO:0044419 | 293  | 234  | 3.18E-08 | interspecies interaction between organisms                            |
| GO:0071826 | 87   | 79   | 3.91E-08 | ribonucleoprotein complex subunit organization                        |
| GO:0070727 | 485  | 370  | 8.83E-08 | cellular macromolecule localization                                   |

|                                         |      |      |          |                                                                      |
|-----------------------------------------|------|------|----------|----------------------------------------------------------------------|
| GO:0016043                              | 2577 | 1796 | 8.89E-08 | cellular component organization                                      |
| GO:0006364                              | 94   | 84   | 9.00E-08 | rRNA processing                                                      |
| GO:0042770                              | 107  | 94   | 1.11E-07 | signal transduction in response to DNA damage                        |
| GO:0034613                              | 483  | 368  | 1.23E-07 | cellular protein localization                                        |
| GO:0051248                              | 200  | 164  | 1.41E-07 | negative regulation of protein metabolic process                     |
| GO:0071845                              | 200  | 164  | 1.41E-07 | cellular component disassembly at cellular level                     |
| GO:0016072                              | 97   | 86   | 1.49E-07 | rRNA metabolic process                                               |
| GO:0007049                              | 1000 | 727  | 1.69E-07 | cell cycle                                                           |
| GO:0022618                              | 82   | 74   | 2.04E-07 | ribonucleoprotein complex assembly                                   |
| GO:0006120                              | 36   | 36   | 2.34E-07 | mitochondrial electron transport, NADH to ubiquinone                 |
| GO:0016070                              | 2266 | 1584 | 2.36E-07 | RNA metabolic process                                                |
| GO:0022411                              | 201  | 164  | 2.72E-07 | cellular component disassembly                                       |
| GO:0032269                              | 193  | 158  | 2.95E-07 | negative regulation of cellular protein metabolic process            |
| GO:0044085                              | 995  | 722  | 3.06E-07 | cellular component biogenesis                                        |
| GO:0010605                              | 775  | 570  | 3.42E-07 | negative regulation of macromolecule metabolic process               |
| GO:0016568                              | 327  | 255  | 3.99E-07 | chromatin modification                                               |
| GO:0031123                              | 75   | 68   | 4.17E-07 | RNA 3'-end processing                                                |
| GO:0051443                              | 75   | 68   | 4.17E-07 | positive regulation of ubiquitin-protein ligase activity             |
| GO:0051436                              | 65   | 60   | 4.17E-07 | negative regulation of ubiquitin-protein ligase activity involved in |
| mitotic cell cycle                      |      |      |          |                                                                      |
| GO:0006369                              | 42   | 41   | 4.24E-07 | termination of RNA polymerase II transcription                       |
| GO:0006446                              | 42   | 41   | 4.24E-07 | regulation of translational initiation                               |
| GO:0006521                              | 48   | 46   | 4.88E-07 | regulation of cellular amino acid metabolic process                  |
| GO:0071822                              | 555  | 416  | 4.97E-07 | protein complex subunit organization                                 |
| GO:0006464                              | 1552 | 1100 | 5.35E-07 | protein modification process                                         |
| GO:0043412                              | 1620 | 1146 | 5.40E-07 | macromolecule modification                                           |
| GO:0006605                              | 235  | 188  | 5.80E-07 | protein targeting                                                    |
| GO:0031018                              | 97   | 85   | 5.88E-07 | endocrine pancreas development                                       |
| GO:0043687                              | 155  | 129  | 6.02E-07 | post-translational protein modification                              |
| GO:0048610                              | 264  | 209  | 6.08E-07 | cellular process involved in reproduction                            |
| GO:0031145                              | 78   | 70   | 7.48E-07 | anaphase-promoting complex-dependent proteasomal ubiquitin-          |
| dependent protein catabolic process     |      |      |          |                                                                      |
| GO:0006353                              | 73   | 66   | 8.08E-07 | transcription termination, DNA-dependent                             |
| GO:0051439                              | 73   | 66   | 8.08E-07 | regulation of ubiquitin-protein ligase activity involved in mitotic  |
| cell cycle                              |      |      |          |                                                                      |
| GO:0009987                              | 8868 | 5879 | 8.28E-07 | cellular process                                                     |
| GO:0006479                              | 63   | 58   | 8.37E-07 | protein methylation                                                  |
| GO:0008213                              | 63   | 58   | 8.37E-07 | protein alkylation                                                   |
| GO:0031571                              | 63   | 58   | 8.37E-07 | mitotic cell cycle G1/S transition DNA damage checkpoint             |
| GO:0051437                              | 68   | 62   | 8.42E-07 | positive regulation of ubiquitin-protein ligase activity involved in |
| mitotic cell cycle                      |      |      |          |                                                                      |
| GO:0051649                              | 1011 | 730  | 9.14E-07 | establishment of localization in cell                                |
| GO:0006520                              | 301  | 235  | 9.67E-07 | cellular amino acid metabolic process                                |
| GO:0051641                              | 1121 | 805  | 9.97E-07 | cellular localization                                                |
| GO:0007005                              | 133  | 112  | 1.00E-06 | mitochondrion organization                                           |
| GO:0034623                              | 145  | 121  | 1.01E-06 | cellular macromolecular complex disassembly                          |
| GO:0006977                              | 57   | 53   | 1.11E-06 | DNA damage response, signal transduction by p53 class                |
| mediator resulting in cell cycle arrest |      |      |          |                                                                      |
| GO:0072395                              | 57   | 53   | 1.11E-06 | signal transduction involved in cell cycle checkpoint                |
| GO:0072401                              | 57   | 53   | 1.11E-06 | signal transduction involved in DNA integrity checkpoint             |
| GO:0072404                              | 57   | 53   | 1.11E-06 | signal transduction involved in G1/S transition checkpoint           |
| GO:0072413                              | 57   | 53   | 1.11E-06 | signal transduction involved in mitotic cell cycle checkpoint        |
| GO:0072422                              | 57   | 53   | 1.11E-06 | signal transduction involved in DNA damage checkpoint                |
| GO:0072431                              | 57   | 53   | 1.11E-06 | signal transduction involved in mitotic cell cycle G1/S transition   |
| DNA damage checkpoint                   |      |      |          |                                                                      |
| GO:0072474                              | 57   | 53   | 1.11E-06 | signal transduction involved in mitotic cell cycle G1/S checkpoint   |
| GO:0031124                              | 66   | 60   | 1.65E-06 | mRNA 3'-end processing                                               |
| GO:0051329                              | 304  | 236  | 2.04E-06 | interphase of mitotic cell cycle                                     |

|            |      |     |          |                                                                |
|------------|------|-----|----------|----------------------------------------------------------------|
| GO:0007093 | 118  | 100 | 2.09E-06 | mitotic cell cycle checkpoint                                  |
| GO:0032984 | 146  | 121 | 2.10E-06 | macromolecular complex disassembly                             |
| GO:0031400 | 134  | 112 | 2.18E-06 | negative regulation of protein modification process            |
| GO:0006259 | 538  | 401 | 2.22E-06 | DNA metabolic process                                          |
| GO:0030330 | 88   | 77  | 2.31E-06 | DNA damage response, signal transduction by p53 class mediator |
| GO:0051726 | 491  | 368 | 2.35E-06 | regulation of cell cycle                                       |
| GO:2000045 | 74   | 66  | 2.68E-06 | regulation of G1/S transition of mitotic cell cycle            |
| GO:0006325 | 402  | 305 | 2.92E-06 | chromatin organization                                         |
| GO:0051325 | 309  | 239 | 2.92E-06 | interphase                                                     |
| GO:0009892 | 815  | 592 | 3.22E-06 | negative regulation of metabolic process                       |
| GO:0016570 | 182  | 147 | 3.55E-06 | histone modification                                           |
| GO:0000956 | 82   | 72  | 3.71E-06 | nuclear-transcribed mRNA catabolic process                     |
| GO:0051352 | 68   | 61  | 4.12E-06 | negative regulation of ligase activity                         |
| GO:0051444 | 68   | 61  | 4.12E-06 | negative regulation of ubiquitin-protein ligase activity       |
| GO:0051438 | 86   | 75  | 4.18E-06 | regulation of ubiquitin-protein ligase activity                |
| GO:0031397 | 81   | 71  | 5.01E-06 | negative regulation of protein ubiquitination                  |
| GO:0006401 | 106  | 90  | 5.75E-06 | RNA catabolic process                                          |
| GO:0043624 | 134  | 111 | 5.81E-06 | cellular protein complex disassembly                           |
| GO:0031016 | 110  | 93  | 5.89E-06 | pancreas development                                           |
| GO:0006915 | 968  | 695 | 6.33E-06 | apoptosis                                                      |
| GO:0031324 | 764  | 555 | 6.58E-06 | negative regulation of cellular metabolic process              |
| GO:0031575 | 71   | 63  | 6.88E-06 | mitotic cell cycle G1/S transition checkpoint                  |
| GO:0071779 | 71   | 63  | 6.88E-06 | G1/S transition checkpoint                                     |
| GO:0012501 | 975  | 699 | 8.21E-06 | programmed cell death                                          |
| GO:0045786 | 334  | 255 | 8.37E-06 | negative regulation of cell cycle                              |
| GO:0016569 | 185  | 148 | 9.21E-06 | covalent chromatin modification                                |
| GO:0008219 | 1063 | 758 | 1.13E-05 | cell death                                                     |
| GO:0043241 | 135  | 111 | 1.17E-05 | protein complex disassembly                                    |
| GO:0065003 | 620  | 454 | 1.26E-05 | macromolecular complex assembly                                |
| GO:0018196 | 82   | 71  | 1.34E-05 | peptidyl-asparagine modification                               |
| GO:0018279 | 82   | 71  | 1.34E-05 | protein N-linked glycosylation via asparagine                  |
| GO:0006091 | 324  | 247 | 1.40E-05 | generation of precursor metabolites and energy                 |
| GO:0016265 | 1064 | 758 | 1.40E-05 | death                                                          |
| GO:0051276 | 531  | 392 | 1.43E-05 | chromosome organization                                        |
| GO:0006402 | 89   | 76  | 2.00E-05 | mRNA catabolic process                                         |
| GO:0000077 | 101  | 85  | 2.16E-05 | DNA damage checkpoint                                          |
| GO:0042180 | 595  | 435 | 2.49E-05 | cellular ketone metabolic process                              |
| GO:0044106 | 350  | 264 | 2.89E-05 | cellular amine metabolic process                               |
| GO:0033238 | 57   | 51  | 3.15E-05 | regulation of cellular amine metabolic process                 |
| GO:0051351 | 79   | 68  | 3.15E-05 | positive regulation of ligase activity                         |
| GO:0000082 | 157  | 126 | 3.17E-05 | G1/S transition of mitotic cell cycle                          |
| GO:0006487 | 87   | 74  | 3.46E-05 | protein N-linked glycosylation                                 |
| GO:0031396 | 130  | 106 | 3.74E-05 | regulation of protein ubiquitination                           |
| GO:0019752 | 581  | 424 | 4.20E-05 | carboxylic acid metabolic process                              |
| GO:0043436 | 581  | 424 | 4.20E-05 | oxoacid metabolic process                                      |
| GO:0006281 | 317  | 240 | 4.29E-05 | DNA repair                                                     |
| GO:0015980 | 234  | 181 | 4.60E-05 | energy derivation by oxidation of organic compounds            |
| GO:0031398 | 102  | 85  | 4.64E-05 | positive regulation of protein ubiquitination                  |
| GO:0000075 | 195  | 153 | 4.72E-05 | cell cycle checkpoint                                          |
| GO:0000387 | 30   | 29  | 5.05E-05 | spliceosomal snRNP assembly                                    |
| GO:0071158 | 60   | 53  | 5.12E-05 | positive regulation of cell cycle arrest                       |
| GO:0051247 | 278  | 212 | 5.44E-05 | positive regulation of protein metabolic process               |
| GO:0043414 | 89   | 75  | 6.01E-05 | macromolecule methylation                                      |
| GO:0051186 | 200  | 156 | 7.03E-05 | cofactor metabolic process                                     |
| GO:0000278 | 599  | 435 | 7.19E-05 | mitotic cell cycle                                             |
| GO:0016571 | 45   | 41  | 7.22E-05 | histone methylation                                            |
| GO:0032270 | 262  | 200 | 7.91E-05 | positive regulation of cellular protein metabolic process      |

|            |      |      |          |                                                                         |
|------------|------|------|----------|-------------------------------------------------------------------------|
| GO:0006399 | 119  | 97   | 8.16E-05 | tRNA metabolic process                                                  |
| GO:0018193 | 339  | 254  | 9.05E-05 | peptidyl-amino acid modification                                        |
| GO:0006839 | 75   | 64   | 9.60E-05 | mitochondrial transport                                                 |
| GO:0007050 | 288  | 218  | 9.74E-05 | cell cycle arrest                                                       |
| GO:0034622 | 385  | 286  | 9.81E-05 | cellular macromolecular complex assembly                                |
| GO:0007346 | 219  | 169  | 1.02E-04 | regulation of mitotic cell cycle                                        |
| GO:0033365 | 236  | 181  | 1.09E-04 | protein localization to organelle                                       |
| GO:0070936 | 28   | 27   | 1.11E-04 | protein K48-linked ubiquitination                                       |
| GO:0046782 | 53   | 47   | 1.11E-04 | regulation of viral transcription                                       |
| GO:0072594 | 66   | 57   | 1.14E-04 | establishment of protein localization to organelle                      |
| GO:0048524 | 57   | 50   | 1.28E-04 | positive regulation of viral reproduction                               |
| GO:0006418 | 48   | 43   | 1.28E-04 | tRNA aminoacylation for protein translation                             |
| GO:0043038 | 48   | 43   | 1.28E-04 | amino acid activation                                                   |
| GO:0043039 | 48   | 43   | 1.28E-04 | tRNA aminoacylation                                                     |
| GO:0051340 | 90   | 75   | 1.30E-04 | regulation of ligase activity                                           |
| GO:0048523 | 1626 | 1129 | 1.30E-04 | negative regulation of cellular process                                 |
| GO:0010629 | 552  | 401  | 1.32E-04 | negative regulation of gene expression                                  |
| GO:0006082 | 590  | 427  | 1.39E-04 | organic acid metabolic process                                          |
| GO:0006888 | 43   | 39   | 1.41E-04 | ER to Golgi vesicle-mediated transport                                  |
| GO:0016197 | 77   | 65   | 1.68E-04 | endosome transport                                                      |
| GO:0016458 | 60   | 52   | 1.89E-04 | gene silencing                                                          |
| GO:0032434 | 32   | 30   | 2.01E-04 | regulation of proteasomal ubiquitin-dependent protein catabolic process |
| GO:0071156 | 201  | 155  | 2.08E-04 | regulation of cell cycle arrest                                         |
| GO:0031570 | 107  | 87   | 2.24E-04 | DNA integrity checkpoint                                                |
| GO:0006308 | 55   | 48   | 2.32E-04 | DNA catabolic process                                                   |
| GO:0000084 | 118  | 95   | 2.36E-04 | S phase of mitotic cell cycle                                           |
| GO:0008334 | 26   | 25   | 2.41E-04 | histone mRNA metabolic process                                          |
| GO:0006352 | 99   | 81   | 2.46E-04 | transcription initiation, DNA-dependent                                 |
| GO:0035270 | 125  | 100  | 2.57E-04 | endocrine system development                                            |
| GO:0043067 | 739  | 527  | 2.70E-04 | regulation of programmed cell death                                     |
| GO:0010604 | 920  | 650  | 2.76E-04 | positive regulation of macromolecule metabolic process                  |
| GO:0042981 | 732  | 522  | 2.89E-04 | regulation of apoptosis                                                 |
| GO:0032259 | 98   | 80   | 3.10E-04 | methylation                                                             |
| GO:0050434 | 49   | 43   | 3.80E-04 | positive regulation of viral transcription                              |
| GO:0051320 | 123  | 98   | 3.91E-04 | S phase                                                                 |
| GO:2000113 | 574  | 413  | 3.98E-04 | negative regulation of cellular macromolecule biosynthetic process      |
| GO:0034968 | 35   | 32   | 4.14E-04 | histone lysine methylation                                              |
| GO:0006260 | 207  | 158  | 4.37E-04 | DNA replication                                                         |
| GO:0010941 | 749  | 532  | 4.65E-04 | regulation of cell death                                                |
| GO:0042147 | 24   | 23   | 5.24E-04 | retrograde transport, endosome to Golgi                                 |
| GO:0010564 | 280  | 209  | 5.32E-04 | regulation of cell cycle process                                        |
| GO:0022402 | 763  | 541  | 5.41E-04 | cell cycle process                                                      |
| GO:0006626 | 34   | 31   | 5.82E-04 | protein targeting to mitochondrion                                      |
| GO:0006903 | 29   | 27   | 5.95E-04 | vesicle targeting                                                       |
| GO:0048519 | 1743 | 1200 | 6.13E-04 | negative regulation of biological process                               |
| GO:0022403 | 636  | 454  | 6.27E-04 | cell cycle phase                                                        |
| GO:0061136 | 38   | 34   | 7.27E-04 | regulation of proteasomal protein catabolic process                     |
| GO:0051568 | 17   | 17   | 7.46E-04 | histone H3-K4 methylation                                               |
| GO:0006900 | 23   | 22   | 7.70E-04 | membrane budding                                                        |
| GO:0006901 | 23   | 22   | 7.70E-04 | vesicle coating                                                         |
| GO:2000243 | 59   | 50   | 8.01E-04 | positive regulation of reproductive process                             |
| GO:0050792 | 63   | 53   | 8.07E-04 | regulation of viral reproduction                                        |
| GO:0009060 | 33   | 30   | 8.16E-04 | aerobic respiration                                                     |
| GO:0022607 | 873  | 614  | 8.42E-04 | cellular component assembly                                             |
| GO:0051172 | 560  | 401  | 8.83E-04 | negative regulation of nitrogen compound metabolic process              |
| GO:0000216 | 74   | 61   | 9.81E-04 | M/G1 transition of mitotic cell cycle                                   |

|            |      |      |          |                                                                                              |
|------------|------|------|----------|----------------------------------------------------------------------------------------------|
| GO:0009312 | 37   | 33   | 1.00E-03 | oligosaccharide biosynthetic process                                                         |
| GO:0015985 | 37   | 33   | 1.00E-03 | energy coupled proton transport, down electrochemical gradient                               |
| GO:0015986 | 37   | 33   | 1.00E-03 | ATP synthesis coupled proton transport                                                       |
| GO:0042274 | 16   | 16   | 1.14E-03 | ribosomal small subunit biogenesis                                                           |
| GO:0017038 | 156  | 120  | 1.24E-03 | protein import                                                                               |
| GO:0045934 | 556  | 397  | 1.32E-03 | negative regulation of nucleobase, nucleoside, nucleotide and nucleic acid metabolic process |
| GO:0006368 | 65   | 54   | 1.33E-03 | transcription elongation from RNA polymerase II promoter                                     |
| GO:0031647 | 53   | 45   | 1.35E-03 | regulation of protein stability                                                              |
| GO:2000241 | 84   | 68   | 1.36E-03 | regulation of reproductive process                                                           |
| GO:0045454 | 57   | 48   | 1.36E-03 | cell redox homeostasis                                                                       |
| GO:0070585 | 36   | 32   | 1.38E-03 | protein localization in mitochondrion                                                        |
| GO:0006367 | 72   | 59   | 1.58E-03 | transcription initiation from RNA polymerase II promoter                                     |
| GO:0030518 | 72   | 59   | 1.58E-03 | steroid hormone receptor signaling pathway                                                   |
| GO:0006488 | 31   | 28   | 1.59E-03 | dolichol-linked oligosaccharide biosynthetic process                                         |
| GO:0034976 | 31   | 28   | 1.59E-03 | response to endoplasmic reticulum stress                                                     |
| GO:0048199 | 21   | 20   | 1.65E-03 | vesicle targeting, to, from or within Golgi                                                  |
| GO:0009109 | 26   | 24   | 1.73E-03 | coenzyme catabolic process                                                                   |
| GO:0009067 | 15   | 15   | 1.74E-03 | aspartate family amino acid biosynthetic process                                             |
| GO:0006366 | 808  | 567  | 1.83E-03 | transcription from RNA polymerase II promoter                                                |
| GO:0072655 | 35   | 31   | 1.88E-03 | establishment of protein localization in mitochondrion                                       |
| GO:0006730 | 136  | 105  | 1.97E-03 | one-carbon metabolic process                                                                 |
| GO:0016481 | 504  | 360  | 2.10E-03 | negative regulation of transcription                                                         |
| GO:0051188 | 118  | 92   | 2.14E-03 | cofactor biosynthetic process                                                                |
| GO:0031325 | 947  | 660  | 2.22E-03 | positive regulation of cellular metabolic process                                            |
| GO:0010558 | 588  | 417  | 2.26E-03 | negative regulation of macromolecule biosynthetic process                                    |
| GO:0006461 | 446  | 320  | 2.33E-03 | protein complex assembly                                                                     |
| GO:0070271 | 449  | 322  | 2.38E-03 | protein complex biogenesis                                                                   |
| GO:0009308 | 398  | 287  | 2.41E-03 | amine metabolic process                                                                      |
| GO:0006891 | 20   | 19   | 2.42E-03 | intra-Golgi vesicle-mediated transport                                                       |
| GO:0030522 | 85   | 68   | 2.45E-03 | intracellular receptor mediated signaling pathway                                            |
| GO:0007006 | 25   | 23   | 2.45E-03 | mitochondrial membrane organization                                                          |
| GO:0046356 | 25   | 23   | 2.45E-03 | acetyl-CoA catabolic process                                                                 |
| GO:0070979 | 25   | 23   | 2.45E-03 | protein K11-linked ubiquitination                                                            |
| GO:0006475 | 70   | 57   | 2.53E-03 | internal protein amino acid acetylation                                                      |
| GO:0018394 | 70   | 57   | 2.53E-03 | peptidyl-lysine acetylation                                                                  |
| GO:0043648 | 34   | 30   | 2.57E-03 | dicarboxylic acid metabolic process                                                          |
| GO:0045947 | 14   | 14   | 2.66E-03 | negative regulation of translational initiation                                              |
| GO:0006986 | 58   | 48   | 2.89E-03 | response to unfolded protein                                                                 |
| GO:0015992 | 50   | 42   | 3.02E-03 | proton transport                                                                             |
| GO:0045727 | 29   | 26   | 3.07E-03 | positive regulation of translation                                                           |
| GO:0018393 | 69   | 56   | 3.19E-03 | internal peptidyl-lysine acetylation                                                         |
| GO:0006732 | 157  | 119  | 3.30E-03 | coenzyme metabolic process                                                                   |
| GO:0031399 | 331  | 240  | 3.35E-03 | regulation of protein modification process                                                   |
| GO:0006099 | 24   | 22   | 3.47E-03 | tricarboxylic acid cycle                                                                     |
| GO:0006779 | 24   | 22   | 3.47E-03 | porphyrin biosynthetic process                                                               |
| GO:0033014 | 24   | 22   | 3.47E-03 | tetrapyrrole biosynthetic process                                                            |
| GO:0000245 | 33   | 29   | 3.50E-03 | spliceosome assembly                                                                         |
| GO:0006473 | 76   | 61   | 3.51E-03 | protein acetylation                                                                          |
| GO:0070534 | 19   | 18   | 3.52E-03 | protein K63-linked ubiquitination                                                            |
| GO:0009893 | 983  | 682  | 3.65E-03 | positive regulation of metabolic process                                                     |
| GO:0006892 | 57   | 47   | 3.70E-03 | post-Golgi vesicle-mediated transport                                                        |
| GO:0046364 | 57   | 47   | 3.70E-03 | monosaccharide biosynthetic process                                                          |
| GO:0031327 | 601  | 424  | 3.78E-03 | negative regulation of cellular biosynthetic process                                         |
| GO:0044281 | 1542 | 1056 | 3.80E-03 | small molecule metabolic process                                                             |
| GO:0055114 | 669  | 470  | 3.86E-03 | oxidation-reduction process                                                                  |
| GO:0016573 | 68   | 55   | 4.00E-03 | histone acetylation                                                                          |
| GO:0042176 | 79   | 63   | 4.04E-03 | regulation of protein catabolic process                                                      |



|            |      |      |          |                                                                                  |
|------------|------|------|----------|----------------------------------------------------------------------------------|
| GO:0042776 | 13   | 13   | 4.06E-03 | mitochondrial ATP synthesis coupled proton transport                             |
| GO:0071844 | 658  | 462  | 4.45E-03 | cellular component assembly at cellular level                                    |
| GO:0009890 | 608  | 428  | 4.61E-03 | negative regulation of biosynthetic process                                      |
| GO:0060255 | 2704 | 1826 | 4.78E-03 | regulation of macromolecule metabolic process                                    |
| GO:0006890 | 23   | 21   | 4.90E-03 | retrograde vesicle-mediated transport, Golgi to ER                               |
| GO:0000288 | 52   | 43   | 4.91E-03 | nuclear-transcribed mRNA catabolic process, deadenylation-dependent decay        |
| GO:0006818 | 52   | 43   | 4.91E-03 | hydrogen transport                                                               |
| GO:0009311 | 52   | 43   | 4.91E-03 | oligosaccharide metabolic process                                                |
| GO:0006612 | 36   | 31   | 5.04E-03 | protein targeting to membrane                                                    |
| GO:0045862 | 36   | 31   | 5.04E-03 | positive regulation of proteolysis                                               |
| GO:0030968 | 18   | 17   | 5.13E-03 | endoplasmic reticulum unfolded protein response                                  |
| GO:0034620 | 18   | 17   | 5.13E-03 | cellular response to unfolded protein                                            |
| GO:0016192 | 594  | 418  | 5.27E-03 | vesicle-mediated transport                                                       |
| GO:0006354 | 92   | 72   | 5.33E-03 | transcription elongation, DNA-dependent                                          |
| GO:0009142 | 81   | 64   | 5.65E-03 | nucleoside triphosphate biosynthetic process                                     |
| GO:0042558 | 27   | 24   | 5.84E-03 | pteridine-containing compound metabolic process                                  |
| GO:0060548 | 329  | 237  | 5.99E-03 | negative regulation of cell death                                                |
| GO:0006921 | 55   | 45   | 5.99E-03 | cellular component disassembly involved in apoptosis                             |
| GO:0043066 | 316  | 228  | 6.14E-03 | negative regulation of apoptosis                                                 |
| GO:0006613 | 12   | 12   | 6.21E-03 | cotranslational protein targeting to membrane                                    |
| GO:0043069 | 319  | 230  | 6.27E-03 | negative regulation of programmed cell death                                     |
| GO:0006458 | 51   | 42   | 6.29E-03 | de novo' protein folding                                                         |
| GO:0007034 | 31   | 27   | 6.41E-03 | vacuolar transport                                                               |
| GO:0051187 | 31   | 27   | 6.41E-03 | cofactor catabolic process                                                       |
| GO:0051052 | 105  | 81   | 6.45E-03 | regulation of DNA metabolic process                                              |
| GO:0007569 | 39   | 33   | 6.78E-03 | cell aging                                                                       |
| GO:0090305 | 39   | 33   | 6.78E-03 | nucleic acid phosphodiester bond hydrolysis                                      |
| GO:0018205 | 87   | 68   | 7.06E-03 | peptidyl-lysine modification                                                     |
| GO:0006810 | 2142 | 1451 | 7.14E-03 | transport                                                                        |
| GO:0006007 | 58   | 47   | 7.15E-03 | glucose catabolic process                                                        |
| GO:0031401 | 208  | 153  | 7.35E-03 | positive regulation of protein modification process                              |
| GO:0043543 | 83   | 65   | 7.72E-03 | protein acylation                                                                |
| GO:0051170 | 114  | 87   | 8.14E-03 | nuclear import                                                                   |
| GO:0051084 | 46   | 38   | 8.39E-03 | de novo' posttranslational protein folding                                       |
| GO:0009145 | 79   | 62   | 8.44E-03 | purine nucleoside triphosphate biosynthetic process                              |
| GO:0009201 | 79   | 62   | 8.44E-03 | ribonucleoside triphosphate biosynthetic process                                 |
| GO:0051234 | 2180 | 1475 | 8.45E-03 | establishment of localization                                                    |
| GO:0006916 | 190  | 140  | 9.12E-03 | anti-apoptosis                                                                   |
| GO:0000097 | 11   | 11   | 9.49E-03 | sulfur amino acid biosynthetic process                                           |
| GO:0006378 | 11   | 11   | 9.49E-03 | mRNA polyadenylation                                                             |
| GO:0042273 | 11   | 11   | 9.49E-03 | ribosomal large subunit biogenesis                                               |
| GO:0043984 | 11   | 11   | 9.49E-03 | histone H4-K16 acetylation                                                       |
| GO:0045815 | 11   | 11   | 9.49E-03 | positive regulation of gene expression, epigenetic                               |
| GO:0010557 | 676  | 471  | 9.55E-03 | positive regulation of macromolecule biosynthetic process                        |
| GO:0000718 | 21   | 19   | 9.66E-03 | nucleotide-excision repair, DNA damage removal                                   |
| GO:0030262 | 21   | 19   | 9.66E-03 | apoptotic nuclear change                                                         |
| GO:0032436 | 21   | 19   | 9.66E-03 | positive regulation of proteasomal ubiquitin-dependent protein catabolic process |

### CE.3) Consistently Expressed Genes: Molecular Function

| GOID | GO #gene | CE #gene | p-value | GOterm |
|------|----------|----------|---------|--------|
|------|----------|----------|---------|--------|

|            |      |      |          |                                                                                           |
|------------|------|------|----------|-------------------------------------------------------------------------------------------|
| GO:0005515 | 5353 | 3840 | 2.74E-45 | protein binding                                                                           |
| GO:0003723 | 729  | 609  | 9.16E-30 | RNA binding                                                                               |
| GO:0003735 | 155  | 150  | 4.54E-22 | structural constituent of ribosome                                                        |
| GO:0005488 | 8579 | 5731 | 1.75E-11 | binding                                                                                   |
| GO:0051082 | 110  | 98   | 9.42E-09 | unfolded protein binding                                                                  |
| GO:0016874 | 401  | 312  | 2.32E-08 | ligase activity                                                                           |
| GO:0003954 | 37   | 37   | 1.43E-07 | NADH dehydrogenase activity                                                               |
| GO:0008137 | 37   | 37   | 1.43E-07 | NADH dehydrogenase (ubiquinone) activity                                                  |
| GO:0050136 | 37   | 37   | 1.43E-07 | NADH dehydrogenase (quinone) activity                                                     |
| GO:0003743 | 50   | 48   | 2.08E-07 | translation initiation factor activity                                                    |
| GO:0016655 | 42   | 41   | 3.95E-07 | oxidoreductase activity, acting on NADH or NADPH, quinone or similar compound as acceptor |
| GO:0016879 | 267  | 209  | 2.29E-06 | ligase activity, forming carbon-nitrogen bonds                                            |
| GO:0019787 | 209  | 167  | 2.42E-06 | small conjugating protein ligase activity                                                 |
| GO:0016881 | 238  | 188  | 2.47E-06 | acid-amino acid ligase activity                                                           |
| GO:0000166 | 1863 | 1299 | 6.24E-06 | nucleotide binding                                                                        |
| GO:0004842 | 189  | 151  | 7.42E-06 | ubiquitin-protein ligase activity                                                         |
| GO:0051287 | 40   | 38   | 9.66E-06 | NAD+ or NADH binding                                                                      |
| GO:0003713 | 198  | 156  | 2.29E-05 | transcription coactivator activity                                                        |
| GO:0003729 | 61   | 54   | 3.48E-05 | mRNA binding                                                                              |
| GO:0016651 | 69   | 60   | 4.43E-05 | oxidoreductase activity, acting on NADH or NADPH                                          |
| GO:0003712 | 325  | 245  | 4.99E-05 | transcription cofactor activity                                                           |
| GO:0008135 | 93   | 78   | 5.50E-05 | translation factor activity, nucleic acid binding                                         |
| GO:0015078 | 80   | 68   | 6.93E-05 | hydrogen ion transmembrane transporter activity                                           |
| GO:0000988 | 326  | 245  | 7.15E-05 | protein binding transcription factor activity                                             |
| GO:0000989 | 326  | 245  | 7.15E-05 | transcription factor binding transcription factor activity                                |
| GO:0004812 | 49   | 44   | 8.67E-05 | aminoacyl-tRNA ligase activity                                                            |
| GO:0016875 | 49   | 44   | 8.67E-05 | ligase activity, forming carbon-oxygen bonds                                              |
| GO:0016876 | 49   | 44   | 8.67E-05 | ligase activity, forming aminoacyl-tRNA and related compounds                             |
| GO:0008565 | 79   | 67   | 9.09E-05 | protein transporter activity                                                              |
| GO:0008276 | 61   | 53   | 1.31E-04 | protein methyltransferase activity                                                        |
| GO:0003824 | 4014 | 2709 | 1.68E-04 | catalytic activity                                                                        |
| GO:0043021 | 42   | 38   | 1.86E-04 | ribonucleoprotein binding                                                                 |
| GO:0048037 | 199  | 152  | 4.67E-04 | cofactor binding                                                                          |
| GO:0005198 | 426  | 310  | 5.20E-04 | structural molecule activity                                                              |
| GO:0003676 | 2475 | 1684 | 7.21E-04 | nucleic acid binding                                                                      |
| GO:0003697 | 55   | 47   | 7.35E-04 | single-stranded DNA binding                                                               |
| GO:0042054 | 46   | 40   | 8.82E-04 | histone methyltransferase activity                                                        |
| GO:0008134 | 242  | 181  | 9.14E-04 | transcription factor binding                                                              |
| GO:0035257 | 74   | 61   | 9.14E-04 | nuclear hormone receptor binding                                                          |
| GO:0051427 | 81   | 66   | 1.06E-03 | hormone receptor binding                                                                  |
| GO:0002039 | 32   | 29   | 1.09E-03 | p53 binding                                                                               |
| GO:0050662 | 149  | 115  | 1.13E-03 | coenzyme binding                                                                          |
| GO:0016853 | 117  | 92   | 1.20E-03 | isomerase activity                                                                        |
| GO:0031072 | 72   | 59   | 1.48E-03 | heat shock protein binding                                                                |
| GO:0019902 | 48   | 41   | 1.65E-03 | phosphatase binding                                                                       |
| GO:0016278 | 39   | 34   | 1.99E-03 | lysine N-methyltransferase activity                                                       |
| GO:0016279 | 39   | 34   | 1.99E-03 | protein-lysine N-methyltransferase activity                                               |
| GO:0016741 | 166  | 126  | 2.10E-03 | transferase activity, transferring one-carbon groups                                      |
| GO:0019843 | 25   | 23   | 2.37E-03 | rRNA binding                                                                              |
| GO:0008320 | 14   | 14   | 2.59E-03 | protein transmembrane transporter activity                                                |
| GO:0022884 | 14   | 14   | 2.59E-03 | macromolecule transmembrane transporter activity                                          |
| GO:0016491 | 503  | 358  | 2.65E-03 | oxidoreductase activity                                                                   |
| GO:0018024 | 38   | 33   | 2.69E-03 | histone-lysine N-methyltransferase activity                                               |
| GO:0019903 | 42   | 36   | 2.82E-03 | protein phosphatase binding                                                               |
| GO:0008168 | 163  | 123  | 3.39E-03 | methyltransferase activity                                                                |
| GO:0004129 | 19   | 18   | 3.42E-03 | cytochrome-c oxidase activity                                                             |
| GO:0015002 | 19   | 18   | 3.42E-03 | heme-copper terminal oxidase activity                                                     |

|                    |     |     |          |                                                            |
|--------------------|-----|-----|----------|------------------------------------------------------------|
| GO:0016675         | 19  | 18  | 3.42E-03 | oxidoreductase activity, acting on a heme group of donors  |
| GO:0016676         | 19  | 18  | 3.42E-03 | oxidoreductase activity, acting on a heme group of donors, |
| oxygen as acceptor |     |     |          |                                                            |
| GO:0008026         | 100 | 78  | 4.15E-03 | ATP-dependent helicase activity                            |
| GO:0070035         | 100 | 78  | 4.15E-03 | purine NTP-dependent helicase activity                     |
| GO:0008757         | 89  | 70  | 4.46E-03 | S-adenosylmethionine-dependent methyltransferase activity  |
| GO:0016859         | 32  | 28  | 4.56E-03 | cis-trans isomerase activity                               |
| GO:0047485         | 67  | 54  | 4.72E-03 | protein N-terminus binding                                 |
| GO:0031625         | 74  | 59  | 5.07E-03 | ubiquitin protein ligase binding                           |
| GO:0003725         | 27  | 24  | 5.64E-03 | double-stranded RNA binding                                |
| GO:0003755         | 31  | 27  | 6.18E-03 | peptidyl-prolyl cis-trans isomerase activity               |
| GO:0042393         | 62  | 50  | 6.34E-03 | histone binding                                            |
| GO:0032182         | 39  | 33  | 6.50E-03 | small conjugating protein binding                          |
| GO:0008170         | 58  | 47  | 6.78E-03 | N-methyltransferase activity                               |
| GO:0004298         | 17  | 16  | 7.24E-03 | threonine-type endopeptidase activity                      |
| GO:0008601         | 17  | 16  | 7.24E-03 | protein phosphatase type 2A regulator activity             |
| GO:0070003         | 17  | 16  | 7.24E-03 | threonine-type peptidase activity                          |
| GO:0003724         | 26  | 23  | 7.75E-03 | RNA helicase activity                                      |
| GO:0046966         | 26  | 23  | 7.75E-03 | thyroid hormone receptor binding                           |
| GO:0008536         | 11  | 11  | 9.29E-03 | Ran GTPase binding                                         |
| GO:0004386         | 133 | 100 | 9.34E-03 | helicase activity                                          |
| GO:0005048         | 21  | 19  | 9.38E-03 | signal sequence binding                                    |

## Part II. Inconsistently Expressed Genes

### IE.1) Inconsistently Expressed Genes: Cellular Component

| GOID       | GO<br>#gene | CE<br>#gene | p-value  | GOterm                                                 |
|------------|-------------|-------------|----------|--------------------------------------------------------|
| GO:0005576 | 810         | 461         | 1.83E-40 | extracellular region                                   |
| GO:0071944 | 2199        | 1004        | 9.88E-32 | cell periphery                                         |
| GO:0005886 | 2160        | 988         | 1.63E-31 | plasma membrane                                        |
| GO:0031224 | 2972        | 1293        | 1.80E-30 | intrinsic to membrane                                  |
| GO:0016021 | 2927        | 1264        | 7.74E-28 | integral to membrane                                   |
| GO:0044421 | 424         | 253         | 2.46E-26 | extracellular region part                              |
| GO:0044425 | 3626        | 1485        | 7.48E-21 | membrane part                                          |
| GO:0044459 | 1214        | 571         | 1.51E-20 | plasma membrane part                                   |
| GO:0031226 | 617         | 318         | 1.96E-18 | intrinsic to plasma membrane                           |
| GO:0005887 | 603         | 310         | 8.78E-18 | integral to plasma membrane                            |
| GO:0005615 | 306         | 176         | 2.21E-16 | extracellular space                                    |
| GO:0031012 | 180         | 114         | 4.52E-15 | extracellular matrix                                   |
| GO:0005578 | 153         | 100         | 1.11E-14 | proteinaceous extracellular matrix                     |
| GO:0016020 | 4585        | 1760        | 4.56E-11 | membrane                                               |
| GO:0034702 | 95          | 62          | 1.39E-09 | ion channel complex                                    |
| GO:0044456 | 165         | 91          | 6.59E-08 | synapse part                                           |
| GO:0045211 | 81          | 52          | 6.67E-08 | postsynaptic membrane                                  |
| GO:0009986 | 219         | 112         | 4.57E-07 | cell surface                                           |
| GO:0009897 | 74          | 46          | 1.47E-06 | external side of plasma membrane                       |
| GO:0045202 | 238         | 118         | 1.77E-06 | synapse                                                |
| GO:0034703 | 66          | 41          | 5.57E-06 | cation channel complex                                 |
| GO:0044420 | 67          | 41          | 9.54E-06 | extracellular matrix part                              |
| GO:0005604 | 48          | 30          | 8.52E-05 | basement membrane                                      |
| GO:0042995 | 555         | 234         | 1.59E-04 | cell projection                                        |
| GO:0044463 | 263         | 120         | 1.77E-04 | cell projection part                                   |
| GO:0005892 | 8           | 8           | 2.18E-04 | nicotinic acetylcholine-gated receptor-channel complex |
| GO:0034706 | 8           | 8           | 2.18E-04 | sodium channel complex                                 |
| GO:0035085 | 28          | 19          | 3.80E-04 | cilium axoneme                                         |
| GO:0031225 | 54          | 31          | 5.77E-04 | anchored to membrane                                   |
| GO:0044442 | 7           | 7           | 6.27E-04 | microtubule-based flagellum part                       |
| GO:0044460 | 7           | 7           | 6.27E-04 | flagellum part                                         |
| GO:0005930 | 33          | 21          | 7.00E-04 | axoneme                                                |
| GO:0044441 | 46          | 27          | 8.06E-04 | cilium part                                            |
| GO:0032982 | 9           | 8           | 1.36E-03 | myosin filament                                        |
| GO:0005929 | 115         | 56          | 1.51E-03 | cilium                                                 |
| GO:0031232 | 6           | 6           | 1.80E-03 | extrinsic to external side of plasma membrane          |
| GO:0001533 | 11          | 9           | 1.98E-03 | cornified envelope                                     |
| GO:0009434 | 11          | 9           | 1.98E-03 | microtubule-based flagellum                            |
| GO:0016010 | 13          | 10          | 2.43E-03 | dystrophin-associated glycoprotein complex             |
| GO:0034704 | 17          | 12          | 2.90E-03 | calcium channel complex                                |
| GO:0005859 | 10          | 8           | 4.70E-03 | muscle myosin complex                                  |
| GO:0016460 | 10          | 8           | 4.70E-03 | myosin II complex                                      |
| GO:0001518 | 5           | 5           | 5.16E-03 | voltage-gated sodium channel complex                   |
| GO:0032279 | 5           | 5           | 5.16E-03 | asymmetric synapse                                     |
| GO:0042613 | 5           | 5           | 5.16E-03 | MHC class II protein complex                           |
| GO:0042383 | 40          | 22          | 7.13E-03 | sarcolemma                                             |
| GO:0043292 | 80          | 39          | 7.18E-03 | contractile fiber                                      |
| GO:0030313 | 7           | 6           | 8.83E-03 | cell envelope                                          |
| GO:0030016 | 76          | 37          | 8.93E-03 | myofibril                                              |
| GO:0043005 | 254         | 107         | 9.23E-03 | neuron projection                                      |

|            |    |    |          |                        |
|------------|----|----|----------|------------------------|
| GO:0042734 | 23 | 14 | 9.67E-03 | presynaptic membrane   |
| GO:0044449 | 74 | 36 | 9.96E-03 | contractile fiber part |

---

## IE.2) Inconsistently Expressed Genes: Biological Process

| GOID       | GO<br>#gene | CE<br>#gene | p-value  | GOterm                                               |
|------------|-------------|-------------|----------|------------------------------------------------------|
| GO:0003008 | 735         | 384         | 8.40E-25 | system process                                       |
| GO:0032501 | 2926        | 1201        | 8.04E-19 | multicellular organismal process                     |
| GO:0050877 | 524         | 266         | 2.94E-15 | neurological system process                          |
| GO:0007267 | 443         | 225         | 4.35E-13 | cell-cell signaling                                  |
| GO:0007600 | 232         | 131         | 3.78E-12 | sensory perception                                   |
| GO:0007186 | 230         | 130         | 4.16E-12 | G-protein coupled receptor protein signaling pathway |
| GO:0007606 | 44          | 37          | 1.57E-11 | sensory perception of chemical stimulus              |
| GO:0007608 | 36          | 32          | 1.73E-11 | sensory perception of smell                          |
| GO:0007155 | 517         | 250         | 1.88E-11 | cell adhesion                                        |
| GO:0022610 | 517         | 250         | 1.88E-11 | biological adhesion                                  |
| GO:0023052 | 2556        | 1016        | 7.31E-11 | signaling                                            |
| GO:0006811 | 506         | 238         | 1.62E-09 | ion transport                                        |
| GO:0007166 | 1151        | 488         | 2.01E-09 | cell surface receptor linked signaling pathway       |
| GO:0007268 | 249         | 128         | 2.18E-08 | synaptic transmission                                |
| GO:0006936 | 118         | 70          | 2.70E-08 | muscle contraction                                   |
| GO:0009190 | 57          | 40          | 3.98E-08 | cyclic nucleotide biosynthetic process               |
| GO:0019226 | 283         | 141         | 5.46E-08 | transmission of nerve impulse                        |
| GO:0035637 | 283         | 141         | 5.46E-08 | multicellular organismal signaling                   |
| GO:0003012 | 127         | 73          | 8.47E-08 | muscle system process                                |
| GO:0050896 | 3789        | 1427        | 1.18E-07 | response to stimulus                                 |
| GO:0007165 | 2343        | 913         | 1.34E-07 | signal transduction                                  |
| GO:0006954 | 171         | 92          | 1.43E-07 | inflammatory response                                |
| GO:0009187 | 71          | 46          | 1.74E-07 | cyclic nucleotide metabolic process                  |
| GO:0044057 | 157         | 85          | 2.96E-07 | regulation of system process                         |
| GO:0046058 | 56          | 38          | 3.49E-07 | cAMP metabolic process                               |
| GO:0007154 | 1045        | 434         | 3.53E-07 | cell communication                                   |
| GO:0040011 | 581         | 257         | 3.54E-07 | locomotion                                           |
| GO:0009605 | 598         | 263         | 4.64E-07 | response to external stimulus                        |
| GO:0032101 | 109         | 63          | 4.92E-07 | regulation of response to external stimulus          |
| GO:0003013 | 127         | 71          | 5.55E-07 | circulatory system process                           |
| GO:0008015 | 127         | 71          | 5.55E-07 | blood circulation                                    |
| GO:0030802 | 53          | 36          | 6.84E-07 | regulation of cyclic nucleotide biosynthetic process |
| GO:0030808 | 53          | 36          | 6.84E-07 | regulation of nucleotide biosynthetic process        |
| GO:0030154 | 1294        | 524         | 8.61E-07 | cell differentiation                                 |
| GO:0030001 | 301         | 144         | 8.79E-07 | metal ion transport                                  |
| GO:0048869 | 1330        | 536         | 1.28E-06 | cellular developmental process                       |
| GO:0006171 | 50          | 34          | 1.34E-06 | cAMP biosynthetic process                            |
| GO:0009653 | 961         | 397         | 2.29E-06 | anatomical structure morphogenesis                   |
| GO:0009611 | 556         | 243         | 2.32E-06 | response to wounding                                 |
| GO:0007586 | 43          | 30          | 2.47E-06 | digestion                                            |
| GO:0030799 | 57          | 37          | 2.61E-06 | regulation of cyclic nucleotide metabolic process    |
| GO:0007588 | 34          | 25          | 3.81E-06 | excretion                                            |
| GO:0006935 | 305         | 143         | 3.92E-06 | chemotaxis                                           |
| GO:0042330 | 305         | 143         | 3.92E-06 | taxis                                                |
| GO:0009124 | 81          | 48          | 4.25E-06 | nucleoside monophosphate biosynthetic process        |
| GO:0030817 | 48          | 32          | 5.32E-06 | regulation of cAMP biosynthetic process              |
| GO:0048514 | 180         | 91          | 5.76E-06 | blood vessel morphogenesis                           |
| GO:0046903 | 400         | 180         | 6.00E-06 | secretion                                            |

|            |      |      |          |                                                                  |
|------------|------|------|----------|------------------------------------------------------------------|
| GO:0007275 | 2137 | 823  | 6.80E-06 | multicellular organismal development                             |
| GO:0007399 | 906  | 373  | 7.04E-06 | nervous system development                                       |
| GO:0030804 | 17   | 15   | 7.16E-06 | positive regulation of cyclic nucleotide biosynthetic process    |
| GO:0030810 | 17   | 15   | 7.16E-06 | positive regulation of nucleotide biosynthetic process           |
| GO:0051239 | 707  | 297  | 1.02E-05 | regulation of multicellular organismal process                   |
| GO:0006812 | 355  | 161  | 1.09E-05 | cation transport                                                 |
| GO:0030801 | 19   | 16   | 1.18E-05 | positive regulation of cyclic nucleotide metabolic process       |
| GO:0045981 | 19   | 16   | 1.18E-05 | positive regulation of nucleotide metabolic process              |
| GO:0006939 | 26   | 20   | 1.19E-05 | smooth muscle contraction                                        |
| GO:0048646 | 343  | 156  | 1.23E-05 | anatomical structure formation involved in morphogenesis         |
| GO:0030814 | 50   | 32   | 1.91E-05 | regulation of cAMP metabolic process                             |
| GO:0009123 | 100  | 55   | 1.95E-05 | nucleoside monophosphate metabolic process                       |
| GO:0048731 | 1777 | 688  | 2.35E-05 | system development                                               |
| GO:0017144 | 13   | 12   | 2.49E-05 | drug metabolic process                                           |
| GO:0030816 | 13   | 12   | 2.49E-05 | positive regulation of cAMP metabolic process                    |
| GO:0030819 | 13   | 12   | 2.49E-05 | positive regulation of cAMP biosynthetic process                 |
| GO:0048468 | 670  | 280  | 2.94E-05 | cell development                                                 |
| GO:0009888 | 549  | 234  | 2.96E-05 | tissue development                                               |
| GO:0010817 | 179  | 88   | 3.25E-05 | regulation of hormone levels                                     |
| GO:0007204 | 51   | 32   | 3.44E-05 | elevation of cytosolic calcium ion concentration                 |
| GO:0051046 | 165  | 82   | 3.66E-05 | regulation of secretion                                          |
| GO:0006874 | 86   | 48   | 3.91E-05 | cellular calcium ion homeostasis                                 |
| GO:0006140 | 187  | 91   | 3.94E-05 | regulation of nucleotide metabolic process                       |
| GO:0031279 | 43   | 28   | 3.99E-05 | regulation of cyclase activity                                   |
| GO:0001525 | 151  | 76   | 4.02E-05 | angiogenesis                                                     |
| GO:0007188 | 37   | 25   | 4.09E-05 | G-protein signaling, coupled to cAMP nucleotide second messenger |
| GO:0007218 | 39   | 26   | 4.10E-05 | neuropeptide signaling pathway                                   |
| GO:0072503 | 93   | 51   | 4.31E-05 | cellular divalent inorganic cation homeostasis                   |
| GO:0045165 | 80   | 45   | 5.23E-05 | cell fate commitment                                             |
| GO:0048856 | 1968 | 753  | 5.44E-05 | anatomical structure development                                 |
| GO:0065007 | 5494 | 1987 | 5.52E-05 | biological regulation                                            |
| GO:0048870 | 369  | 163  | 5.58E-05 | cell motility                                                    |
| GO:0051674 | 369  | 163  | 5.58E-05 | localization of cell                                             |
| GO:0048871 | 54   | 33   | 5.64E-05 | multicellular organismal homeostasis                             |
| GO:0007389 | 191  | 92   | 5.85E-05 | pattern specification process                                    |
| GO:0050806 | 12   | 11   | 6.71E-05 | positive regulation of synaptic transmission                     |
| GO:0051971 | 12   | 11   | 6.71E-05 | positive regulation of transmission of nerve impulse             |
| GO:0003001 | 153  | 76   | 7.09E-05 | generation of a signal involved in cell-cell signaling           |
| GO:0023061 | 153  | 76   | 7.09E-05 | signal release                                                   |
| GO:0051339 | 44   | 28   | 7.36E-05 | regulation of lyase activity                                     |
| GO:0045761 | 42   | 27   | 7.64E-05 | regulation of adenylate cyclase activity                         |
| GO:0006816 | 90   | 49   | 7.73E-05 | calcium ion transport                                            |
| GO:0055074 | 90   | 49   | 7.73E-05 | calcium ion homeostasis                                          |
| GO:0032502 | 2362 | 892  | 7.89E-05 | developmental process                                            |
| GO:0032102 | 38   | 25   | 8.04E-05 | negative regulation of response to external stimulus             |
| GO:0072507 | 97   | 52   | 8.15E-05 | divalent inorganic cation homeostasis                            |
| GO:0030182 | 500  | 212  | 1.02E-04 | neuron differentiation                                           |
| GO:0006952 | 459  | 196  | 1.16E-04 | defense response                                                 |
| GO:0019933 | 49   | 30   | 1.16E-04 | cAMP-mediated signaling                                          |
| GO:0008217 | 45   | 28   | 1.31E-04 | regulation of blood pressure                                     |
| GO:0048699 | 531  | 223  | 1.36E-04 | generation of neurons                                            |
| GO:0006813 | 78   | 43   | 1.43E-04 | potassium ion transport                                          |
| GO:0006814 | 78   | 43   | 1.43E-04 | sodium ion transport                                             |
| GO:0051480 | 56   | 33   | 1.54E-04 | cytosolic calcium ion homeostasis                                |
| GO:0001944 | 225  | 104  | 1.58E-04 | vasculature development                                          |
| GO:0009566 | 35   | 23   | 1.59E-04 | fertilization                                                    |
| GO:0007271 | 11   | 10   | 1.79E-04 | synaptic transmission, cholinergic                               |

|            |      |      |          |                                                                    |
|------------|------|------|----------|--------------------------------------------------------------------|
| GO:0007423 | 159  | 77   | 1.83E-04 | sensory organ development                                          |
| GO:0032940 | 335  | 147  | 1.86E-04 | secretion by cell                                                  |
| GO:0007187 | 50   | 30   | 1.95E-04 | G-protein signaling, coupled to cyclic nucleotide second messenger |
| GO:0016477 | 351  | 153  | 2.04E-04 | cell migration                                                     |
| GO:0015672 | 189  | 89   | 2.09E-04 | monovalent inorganic cation transport                              |
| GO:0032989 | 458  | 194  | 2.13E-04 | cellular component morphogenesis                                   |
| GO:0048878 | 349  | 152  | 2.24E-04 | chemical homeostasis                                               |
| GO:0010959 | 68   | 38   | 2.36E-04 | regulation of metal ion transport                                  |
| GO:0001568 | 212  | 98   | 2.40E-04 | blood vessel development                                           |
| GO:0000904 | 378  | 163  | 2.43E-04 | cell morphogenesis involved in differentiation                     |
| GO:0001775 | 373  | 161  | 2.50E-04 | cell activation                                                    |
| GO:0042471 | 42   | 26   | 2.56E-04 | ear morphogenesis                                                  |
| GO:0042446 | 40   | 25   | 2.71E-04 | hormone biosynthetic process                                       |
| GO:0051048 | 38   | 24   | 2.85E-04 | negative regulation of secretion                                   |
| GO:0006955 | 442  | 187  | 2.97E-04 | immune response                                                    |
| GO:0006937 | 36   | 23   | 2.98E-04 | regulation of muscle contraction                                   |
| GO:0042472 | 36   | 23   | 2.98E-04 | inner ear morphogenesis                                            |
| GO:0048666 | 424  | 180  | 3.12E-04 | neuron development                                                 |
| GO:0007338 | 26   | 18   | 3.17E-04 | single fertilization                                               |
| GO:0003018 | 51   | 30   | 3.19E-04 | vascular process in circulatory system                             |
| GO:0007416 | 30   | 20   | 3.22E-04 | synapse assembly                                                   |
| GO:0019932 | 164  | 78   | 3.42E-04 | second-messenger-mediated signaling                                |
| GO:0051240 | 164  | 78   | 3.42E-04 | positive regulation of multicellular organismal process            |
| GO:0050808 | 45   | 27   | 4.05E-04 | synapse organization                                               |
| GO:0000902 | 434  | 183  | 4.20E-04 | cell morphogenesis                                                 |
| GO:0002683 | 56   | 32   | 4.21E-04 | negative regulation of immune system process                       |
| GO:0048667 | 335  | 145  | 4.31E-04 | cell morphogenesis involved in neuron differentiation              |
| GO:0050801 | 263  | 117  | 4.32E-04 | ion homeostasis                                                    |
| GO:0008016 | 43   | 26   | 4.36E-04 | regulation of heart contraction                                    |
| GO:0015718 | 43   | 26   | 4.36E-04 | monocarboxylic acid transport                                      |
| GO:0048812 | 338  | 146  | 4.60E-04 | neuron projection morphogenesis                                    |
| GO:0007417 | 302  | 132  | 4.74E-04 | central nervous system development                                 |
| GO:0042312 | 10   | 9    | 4.75E-04 | regulation of vasodilation                                         |
| GO:0002088 | 17   | 13   | 4.97E-04 | lens development in camera-type eye                                |
| GO:0051924 | 52   | 30   | 5.06E-04 | regulation of calcium ion transport                                |
| GO:0051716 | 2849 | 1054 | 5.16E-04 | cellular response to stimulus                                      |
| GO:0016337 | 206  | 94   | 5.51E-04 | cell-cell adhesion                                                 |
| GO:0050866 | 35   | 22   | 5.62E-04 | negative regulation of cell activation                             |
| GO:0048016 | 19   | 14   | 5.64E-04 | inositol phosphate-mediated signaling                              |
| GO:0006355 | 1429 | 548  | 5.67E-04 | regulation of transcription, DNA-dependent                         |
| GO:0055085 | 593  | 242  | 5.73E-04 | transmembrane transport                                            |
| GO:0045909 | 7    | 7    | 5.80E-04 | positive regulation of vasodilation                                |
| GO:0015833 | 96   | 49   | 5.96E-04 | peptide transport                                                  |
| GO:0016339 | 21   | 15   | 6.09E-04 | calcium-dependent cell-cell adhesion                               |
| GO:0007194 | 27   | 18   | 6.45E-04 | negative regulation of adenylate cyclase activity                  |
| GO:0007270 | 27   | 18   | 6.45E-04 | nerve-nerve synaptic transmission                                  |
| GO:0031280 | 27   | 18   | 6.45E-04 | negative regulation of cyclase activity                            |
| GO:0051350 | 27   | 18   | 6.45E-04 | negative regulation of lyase activity                              |
| GO:0061041 | 27   | 18   | 6.45E-04 | regulation of wound healing                                        |
| GO:0006928 | 440  | 184  | 6.62E-04 | cellular component movement                                        |
| GO:0048729 | 192  | 88   | 6.85E-04 | tissue morphogenesis                                               |
| GO:0009914 | 106  | 53   | 6.88E-04 | hormone transport                                                  |
| GO:0007411 | 225  | 101  | 7.10E-04 | axon guidance                                                      |
| GO:0009790 | 438  | 183  | 7.20E-04 | embryo development                                                 |
| GO:0070661 | 71   | 38   | 7.45E-04 | leukocyte proliferation                                            |
| GO:0090257 | 42   | 25   | 7.79E-04 | regulation of muscle system process                                |
| GO:0048839 | 53   | 30   | 7.85E-04 | inner ear development                                              |

|            |      |      |          |                                                                         |
|------------|------|------|----------|-------------------------------------------------------------------------|
| GO:0035150 | 40   | 24   | 8.43E-04 | regulation of tube size                                                 |
| GO:0050880 | 40   | 24   | 8.43E-04 | regulation of blood vessel size                                         |
| GO:0046879 | 102  | 51   | 8.61E-04 | hormone secretion                                                       |
| GO:0050954 | 60   | 33   | 8.72E-04 | sensory perception of mechanical stimulus                               |
| GO:0051050 | 171  | 79   | 9.44E-04 | positive regulation of transport                                        |
| GO:0050727 | 49   | 28   | 9.51E-04 | regulation of inflammatory response                                     |
| GO:0031646 | 14   | 11   | 9.57E-04 | positive regulation of neurological system process                      |
| GO:0035249 | 14   | 11   | 9.57E-04 | synaptic transmission, glutamatergic                                    |
| GO:0046849 | 14   | 11   | 9.57E-04 | bone remodeling                                                         |
| GO:0019935 | 65   | 35   | 1.03E-03 | cyclic-nucleotide-mediated signaling                                    |
| GO:0007601 | 122  | 59   | 1.03E-03 | visual perception                                                       |
| GO:0050953 | 122  | 59   | 1.03E-03 | sensory perception of light stimulus                                    |
| GO:0070838 | 115  | 56   | 1.12E-03 | divalent metal ion transport                                            |
| GO:0006940 | 16   | 12   | 1.12E-03 | regulation of smooth muscle contraction                                 |
| GO:0007409 | 305  | 131  | 1.15E-03 | axonogenesis                                                            |
| GO:0048858 | 373  | 157  | 1.15E-03 | cell projection morphogenesis                                           |
| GO:0002695 | 30   | 19   | 1.17E-03 | negative regulation of leukocyte activation                             |
| GO:0019722 | 30   | 19   | 1.17E-03 | calcium-mediated signaling                                              |
| GO:0009410 | 70   | 37   | 1.18E-03 | response to xenobiotic stimulus                                         |
| GO:0043269 | 77   | 40   | 1.19E-03 | regulation of ion transport                                             |
| GO:0009583 | 18   | 13   | 1.22E-03 | detection of light stimulus                                             |
| GO:0050728 | 18   | 13   | 1.22E-03 | negative regulation of inflammatory response                            |
| GO:0050886 | 18   | 13   | 1.22E-03 | endocrine process                                                       |
| GO:0048598 | 218  | 97   | 1.27E-03 | embryonic morphogenesis                                                 |
| GO:0007193 | 24   | 16   | 1.30E-03 | inhibition of adenylate cyclase activity by G-protein signaling pathway |
| GO:0009887 | 345  | 146  | 1.30E-03 | organ morphogenesis                                                     |
| GO:0042445 | 82   | 42   | 1.30E-03 | hormone metabolic process                                               |
| GO:0003014 | 22   | 15   | 1.31E-03 | renal system process                                                    |
| GO:0030193 | 22   | 15   | 1.31E-03 | regulation of blood coagulation                                         |
| GO:0003015 | 52   | 29   | 1.32E-03 | heart process                                                           |
| GO:0060047 | 52   | 29   | 1.32E-03 | heart contraction                                                       |
| GO:0006805 | 68   | 36   | 1.32E-03 | xenobiotic metabolic process                                            |
| GO:0032943 | 68   | 36   | 1.32E-03 | mononuclear cell proliferation                                          |
| GO:0046651 | 68   | 36   | 1.32E-03 | lymphocyte proliferation                                                |
| GO:0071466 | 68   | 36   | 1.32E-03 | cellular response to xenobiotic stimulus                                |
| GO:0006873 | 244  | 107  | 1.36E-03 | cellular ion homeostasis                                                |
| GO:0050795 | 41   | 24   | 1.37E-03 | regulation of behavior                                                  |
| GO:0072511 | 116  | 56   | 1.44E-03 | divalent inorganic cation transport                                     |
| GO:0048562 | 80   | 41   | 1.46E-03 | embryonic organ morphogenesis                                           |
| GO:0007565 | 66   | 35   | 1.47E-03 | female pregnancy                                                        |
| GO:0007610 | 186  | 84   | 1.54E-03 | behavior                                                                |
| GO:0010876 | 136  | 64   | 1.57E-03 | lipid localization                                                      |
| GO:0009953 | 37   | 22   | 1.63E-03 | dorsal/ventral pattern formation                                        |
| GO:0022008 | 557  | 225  | 1.66E-03 | neurogenesis                                                            |
| GO:0021892 | 6    | 6    | 1.68E-03 | cerebral cortex GABAergic interneuron differentiation                   |
| GO:0034501 | 6    | 6    | 1.68E-03 | protein localization to kinetochore                                     |
| GO:0006869 | 124  | 59   | 1.69E-03 | lipid transport                                                         |
| GO:0002376 | 774  | 305  | 1.72E-03 | immune system process                                                   |
| GO:0045137 | 107  | 52   | 1.74E-03 | development of primary sexual characteristics                           |
| GO:0019953 | 287  | 123  | 1.76E-03 | sexual reproduction                                                     |
| GO:0046068 | 11   | 9    | 1.81E-03 | cGMP metabolic process                                                  |
| GO:0051899 | 33   | 20   | 1.91E-03 | membrane depolarization                                                 |
| GO:0007420 | 228  | 100  | 1.91E-03 | brain development                                                       |
| GO:0050794 | 4968 | 1783 | 1.93E-03 | regulation of cellular process                                          |
| GO:0032990 | 377  | 157  | 1.96E-03 | cell part morphogenesis                                                 |
| GO:0031175 | 385  | 160  | 1.98E-03 | neuron projection development                                           |
| GO:0021772 | 13   | 10   | 2.21E-03 | olfactory bulb development                                              |



|            |      |      |          |                                                                                                                                |
|------------|------|------|----------|--------------------------------------------------------------------------------------------------------------------------------|
| GO:0030728 | 13   | 10   | 2.21E-03 | ovulation                                                                                                                      |
| GO:0045453 | 13   | 10   | 2.21E-03 | bone resorption                                                                                                                |
| GO:0030900 | 113  | 54   | 2.31E-03 | forebrain development                                                                                                          |
| GO:0007224 | 27   | 17   | 2.33E-03 | smoothened signaling pathway                                                                                                   |
| GO:0071702 | 323  | 136  | 2.35E-03 | organic substance transport                                                                                                    |
| GO:0048568 | 123  | 58   | 2.39E-03 | embryonic organ development                                                                                                    |
| GO:0001654 | 101  | 49   | 2.44E-03 | eye development                                                                                                                |
| GO:0050789 | 5203 | 1862 | 2.52E-03 | regulation of biological process                                                                                               |
| GO:0007605 | 56   | 30   | 2.55E-03 | sensory perception of sound                                                                                                    |
| GO:0006775 | 23   | 15   | 2.56E-03 | fat-soluble vitamin metabolic process                                                                                          |
| GO:0048489 | 23   | 15   | 2.56E-03 | synaptic vesicle transport                                                                                                     |
| GO:0007200 | 17   | 12   | 2.61E-03 | activation of phospholipase C activity by G-protein coupled receptor protein signaling pathway coupled to IP3 second messenger |
| GO:0001894 | 38   | 22   | 2.62E-03 | tissue homeostasis                                                                                                             |
| GO:0046888 | 21   | 14   | 2.63E-03 | negative regulation of hormone secretion                                                                                       |
| GO:0055082 | 251  | 108  | 2.78E-03 | cellular chemical homeostasis                                                                                                  |
| GO:0051252 | 1474 | 556  | 2.78E-03 | regulation of RNA metabolic process                                                                                            |
| GO:0008406 | 97   | 47   | 3.05E-03 | gonad development                                                                                                              |
| GO:0034097 | 200  | 88   | 3.09E-03 | response to cytokine stimulus                                                                                                  |
| GO:0007018 | 102  | 49   | 3.14E-03 | microtubule-based movement                                                                                                     |
| GO:0048771 | 34   | 20   | 3.14E-03 | tissue remodeling                                                                                                              |
| GO:0030030 | 485  | 196  | 3.15E-03 | cell projection organization                                                                                                   |
| GO:0002504 | 8    | 7    | 3.24E-03 | antigen processing and presentation of peptide or polysaccharide antigen via MHC class II                                      |
| GO:0006182 | 8    | 7    | 3.24E-03 | cGMP biosynthetic process                                                                                                      |
| GO:0009584 | 8    | 7    | 3.24E-03 | detection of visible light                                                                                                     |
| GO:0043266 | 8    | 7    | 3.24E-03 | regulation of potassium ion transport                                                                                          |
| GO:0045987 | 8    | 7    | 3.24E-03 | positive regulation of smooth muscle contraction                                                                               |
| GO:0048488 | 8    | 7    | 3.24E-03 | synaptic vesicle endocytosis                                                                                                   |
| GO:0046649 | 208  | 91   | 3.25E-03 | lymphocyte activation                                                                                                          |
| GO:0015849 | 112  | 53   | 3.28E-03 | organic acid transport                                                                                                         |
| GO:0001501 | 175  | 78   | 3.42E-03 | skeletal system development                                                                                                    |
| GO:0030510 | 32   | 19   | 3.43E-03 | regulation of BMP signaling pathway                                                                                            |
| GO:0060429 | 250  | 107  | 3.55E-03 | epithelium development                                                                                                         |
| GO:0043583 | 64   | 33   | 3.60E-03 | ear development                                                                                                                |
| GO:0015908 | 30   | 18   | 3.73E-03 | fatty acid transport                                                                                                           |
| GO:0043010 | 76   | 38   | 3.74E-03 | camera-type eye development                                                                                                    |
| GO:0032879 | 573  | 228  | 3.75E-03 | regulation of localization                                                                                                     |
| GO:0046660 | 62   | 32   | 4.04E-03 | female sex differentiation                                                                                                     |
| GO:0031348 | 28   | 17   | 4.04E-03 | negative regulation of defense response                                                                                        |
| GO:0051250 | 28   | 17   | 4.04E-03 | negative regulation of lymphocyte activation                                                                                   |
| GO:0008585 | 55   | 29   | 4.07E-03 | female gonad development                                                                                                       |
| GO:0007548 | 123  | 57   | 4.18E-03 | sex differentiation                                                                                                            |
| GO:0019216 | 91   | 44   | 4.28E-03 | regulation of lipid metabolic process                                                                                          |
| GO:0018298 | 10   | 8    | 4.34E-03 | protein-chromophore linkage                                                                                                    |
| GO:0045933 | 10   | 8    | 4.34E-03 | positive regulation of muscle contraction                                                                                      |
| GO:0009880 | 26   | 16   | 4.36E-03 | embryonic pattern specification                                                                                                |
| GO:0031644 | 67   | 34   | 4.39E-03 | regulation of neurological system process                                                                                      |
| GO:0045321 | 241  | 103  | 4.40E-03 | leukocyte activation                                                                                                           |
| GO:0050804 | 60   | 31   | 4.53E-03 | regulation of synaptic transmission                                                                                            |
| GO:0046942 | 111  | 52   | 4.61E-03 | carboxylic acid transport                                                                                                      |
| GO:0007631 | 24   | 15   | 4.66E-03 | feeding behavior                                                                                                               |
| GO:0031281 | 24   | 15   | 4.66E-03 | positive regulation of cyclase activity                                                                                        |
| GO:0048583 | 1148 | 436  | 4.84E-03 | regulation of response to stimulus                                                                                             |
| GO:2000026 | 446  | 180  | 4.85E-03 | regulation of multicellular organismal development                                                                             |
| GO:0014061 | 5    | 5    | 4.88E-03 | regulation of norepinephrine secretion                                                                                         |
| GO:0014821 | 5    | 5    | 4.88E-03 | phasic smooth muscle contraction                                                                                               |
| GO:0015874 | 5    | 5    | 4.88E-03 | norepinephrine transport                                                                                                       |

|            |      |     |          |                                                                                  |
|------------|------|-----|----------|----------------------------------------------------------------------------------|
| GO:0021826 | 5    | 5   | 4.88E-03 | substrate-independent telencephalic tangential migration                         |
| GO:0021843 | 5    | 5   | 4.88E-03 | substrate-independent telencephalic tangential interneuron migration             |
| GO:0030147 | 5    | 5   | 4.88E-03 | natriuresis                                                                      |
| GO:0035095 | 5    | 5   | 4.88E-03 | behavioral response to nicotine                                                  |
| GO:0048243 | 5    | 5   | 4.88E-03 | norepinephrine secretion                                                         |
| GO:0051552 | 5    | 5   | 4.88E-03 | flavone metabolic process                                                        |
| GO:0007190 | 22   | 14  | 4.95E-03 | activation of adenylate cyclase activity                                         |
| GO:0018149 | 12   | 9   | 5.01E-03 | peptide cross-linking                                                            |
| GO:0043113 | 12   | 9   | 5.01E-03 | receptor clustering                                                              |
| GO:0048513 | 1168 | 443 | 5.02E-03 | organ development                                                                |
| GO:0046545 | 58   | 30  | 5.08E-03 | development of primary female sexual characteristics                             |
| GO:0003002 | 129  | 59  | 5.15E-03 | regionalization                                                                  |
| GO:0046883 | 82   | 40  | 5.18E-03 | regulation of hormone secretion                                                  |
| GO:0001659 | 14   | 10  | 5.34E-03 | temperature homeostasis                                                          |
| GO:0001893 | 14   | 10  | 5.34E-03 | maternal placenta development                                                    |
| GO:0007602 | 14   | 10  | 5.34E-03 | phototransduction                                                                |
| GO:0016079 | 14   | 10  | 5.34E-03 | synaptic vesicle exocytosis                                                      |
| GO:0021988 | 14   | 10  | 5.34E-03 | olfactory lobe development                                                       |
| GO:0048483 | 14   | 10  | 5.34E-03 | autonomic nervous system development                                             |
| GO:0015844 | 18   | 12  | 5.37E-03 | monoamine transport                                                              |
| GO:0030195 | 18   | 12  | 5.37E-03 | negative regulation of blood coagulation                                         |
| GO:0007189 | 16   | 11  | 5.44E-03 | activation of adenylate cyclase activity by G-protein signaling pathway          |
| GO:0010578 | 16   | 11  | 5.44E-03 | regulation of adenylate cyclase activity involved in G-protein signaling pathway |
| GO:0010579 | 16   | 11  | 5.44E-03 | positive regulation of adenylate cyclase activity by G-protein signaling pathway |
| GO:0016525 | 16   | 11  | 5.44E-03 | negative regulation of angiogenesis                                              |
| GO:0035136 | 16   | 11  | 5.44E-03 | forelimb morphogenesis                                                           |
| GO:0051952 | 16   | 11  | 5.44E-03 | regulation of amine transport                                                    |
| GO:0009581 | 33   | 19  | 5.50E-03 | detection of external stimulus                                                   |
| GO:0042391 | 92   | 44  | 5.50E-03 | regulation of membrane potential                                                 |
| GO:0007156 | 102  | 48  | 5.69E-03 | homophilic cell adhesion                                                         |
| GO:0072358 | 338  | 139 | 5.86E-03 | cardiovascular system development                                                |
| GO:0072359 | 338  | 139 | 5.86E-03 | circulatory system development                                                   |
| GO:0001763 | 85   | 41  | 6.00E-03 | morphogenesis of a branching structure                                           |
| GO:0050878 | 357  | 146 | 6.11E-03 | regulation of body fluid levels                                                  |
| GO:0002443 | 73   | 36  | 6.24E-03 | leukocyte mediated immunity                                                      |
| GO:0031670 | 29   | 17  | 6.66E-03 | cellular response to nutrient                                                    |
| GO:0061138 | 71   | 35  | 7.01E-03 | morphogenesis of a branching epithelium                                          |
| GO:0042060 | 377  | 153 | 7.09E-03 | wound healing                                                                    |
| GO:0015837 | 98   | 46  | 7.10E-03 | amine transport                                                                  |
| GO:0021953 | 45   | 24  | 7.16E-03 | central nervous system neuron differentiation                                    |
| GO:0070663 | 52   | 27  | 7.17E-03 | regulation of leukocyte proliferation                                            |
| GO:0042592 | 572  | 225 | 7.34E-03 | homeostatic process                                                              |
| GO:0051969 | 64   | 32  | 7.46E-03 | regulation of transmission of nerve impulse                                      |
| GO:0030855 | 126  | 57  | 7.79E-03 | epithelial cell differentiation                                                  |
| GO:0050818 | 25   | 15  | 7.97E-03 | regulation of coagulation                                                        |
| GO:0051349 | 25   | 15  | 7.97E-03 | positive regulation of lyase activity                                            |
| GO:0032103 | 43   | 23  | 8.02E-03 | positive regulation of response to external stimulus                             |
| GO:0032944 | 50   | 26  | 8.04E-03 | regulation of mononuclear cell proliferation                                     |
| GO:0050670 | 50   | 26  | 8.04E-03 | regulation of lymphocyte proliferation                                           |
| GO:0061061 | 206  | 88  | 8.15E-03 | muscle structure development                                                     |
| GO:0007622 | 7    | 6   | 8.30E-03 | rhythmic behavior                                                                |
| GO:0010677 | 7    | 6   | 8.30E-03 | negative regulation of cellular carbohydrate metabolic process                   |
| GO:0019317 | 7    | 6   | 8.30E-03 | fucose catabolic process                                                         |
| GO:0032715 | 7    | 6   | 8.30E-03 | negative regulation of interleukin-6 production                                  |

|            |     |    |          |                                                                                                                           |
|------------|-----|----|----------|---------------------------------------------------------------------------------------------------------------------------|
| GO:0042355 | 7   | 6  | 8.30E-03 | L-fucose catabolic process                                                                                                |
| GO:0043383 | 7   | 6  | 8.30E-03 | negative T cell selection                                                                                                 |
| GO:0045005 | 7   | 6  | 8.30E-03 | maintenance of fidelity involved in DNA-dependent DNA replication                                                         |
| GO:0045912 | 7   | 6  | 8.30E-03 | negative regulation of carbohydrate metabolic process                                                                     |
| GO:0048484 | 7   | 6  | 8.30E-03 | enteric nervous system development                                                                                        |
| GO:0051279 | 7   | 6  | 8.30E-03 | regulation of release of sequestered calcium ion into cytosol                                                             |
| GO:2000273 | 7   | 6  | 8.30E-03 | positive regulation of receptor activity                                                                                  |
| GO:0040012 | 175 | 76 | 8.35E-03 | regulation of locomotion                                                                                                  |
| GO:0050708 | 34  | 19 | 8.48E-03 | regulation of protein secretion                                                                                           |
| GO:0061180 | 34  | 19 | 8.48E-03 | mammary gland epithelium development                                                                                      |
| GO:0007517 | 152 | 67 | 8.59E-03 | muscle organ development                                                                                                  |
| GO:0021675 | 23  | 14 | 8.66E-03 | nerve development                                                                                                         |
| GO:0045762 | 23  | 14 | 8.66E-03 | positive regulation of adenylate cyclase activity                                                                         |
| GO:0002790 | 89  | 42 | 8.77E-03 | peptide secretion                                                                                                         |
| GO:0002460 | 55  | 28 | 8.79E-03 | adaptive immune response based on somatic recombination of immune receptors built from immunoglobulin superfamily domains |
| GO:0055065 | 142 | 63 | 8.97E-03 | metal ion homeostasis                                                                                                     |
| GO:0006875 | 137 | 61 | 9.15E-03 | cellular metal ion homeostasis                                                                                            |
| GO:0021510 | 21  | 13 | 9.36E-03 | spinal cord development                                                                                                   |
| GO:0009582 | 32  | 18 | 9.43E-03 | detection of abiotic stimulus                                                                                             |
| GO:0030048 | 32  | 18 | 9.43E-03 | actin filament-based movement                                                                                             |
| GO:0050864 | 32  | 18 | 9.43E-03 | regulation of B cell activation                                                                                           |
| GO:0048511 | 97  | 45 | 9.93E-03 | rhythmic process                                                                                                          |

### IE.3) Inconsistently Expressed Genes: Molecular Function

| GOID       | GO #gene | CE #gene | p-value  | GOterm                                                     |
|------------|----------|----------|----------|------------------------------------------------------------|
| GO:0004888 | 387      | 256      | 6.48E-38 | transmembrane receptor activity                            |
| GO:0004872 | 607      | 357      | 4.09E-36 | receptor activity                                          |
| GO:0004930 | 169      | 128      | 4.20E-28 | G-protein coupled receptor activity                        |
| GO:0004871 | 876      | 454      | 7.03E-28 | signal transducer activity                                 |
| GO:0060089 | 876      | 454      | 7.03E-28 | molecular transducer activity                              |
| GO:0015267 | 191      | 123      | 2.67E-17 | channel activity                                           |
| GO:0022803 | 191      | 123      | 2.67E-17 | passive transmembrane transporter activity                 |
| GO:0022838 | 186      | 120      | 5.31E-17 | substrate-specific channel activity                        |
| GO:0005216 | 183      | 118      | 1.03E-16 | ion channel activity                                       |
| GO:0004984 | 28       | 28       | 1.18E-13 | olfactory receptor activity                                |
| GO:0005261 | 127      | 84       | 3.43E-13 | cation channel activity                                    |
| GO:0022836 | 134      | 84       | 2.54E-11 | gated channel activity                                     |
| GO:0042165 | 32       | 28       | 8.47E-10 | neurotransmitter binding                                   |
| GO:0005179 | 31       | 27       | 2.15E-09 | hormone activity                                           |
| GO:0001653 | 36       | 30       | 2.41E-09 | peptide receptor activity                                  |
| GO:0008528 | 36       | 30       | 2.41E-09 | peptide receptor activity, G-protein coupled               |
| GO:0015276 | 50       | 38       | 2.53E-09 | ligand-gated ion channel activity                          |
| GO:0022834 | 50       | 38       | 2.53E-09 | ligand-gated channel activity                              |
| GO:0030594 | 29       | 25       | 1.38E-08 | neurotransmitter receptor activity                         |
| GO:0022857 | 525      | 237      | 2.07E-07 | transmembrane transporter activity                         |
| GO:0005230 | 23       | 20       | 3.19E-07 | extracellular ligand-gated ion channel activity            |
| GO:0005231 | 17       | 16       | 4.80E-07 | excitatory extracellular ligand-gated ion channel activity |
| GO:0015075 | 405      | 187      | 6.57E-07 | ion transmembrane transporter activity                     |
| GO:0022891 | 490      | 219      | 1.49E-06 | substrate-specific transmembrane transporter activity      |
| GO:0022843 | 63       | 40       | 2.64E-06 | voltage-gated cation channel activity                      |
| GO:0004497 | 36       | 26       | 4.56E-06 | monooxygenase activity                                     |

|            |      |      |          |                                                                                                                                                                                             |
|------------|------|------|----------|---------------------------------------------------------------------------------------------------------------------------------------------------------------------------------------------|
| GO:0005262 | 46   | 31   | 5.77E-06 | calcium channel activity                                                                                                                                                                    |
| GO:0042923 | 17   | 15   | 7.53E-06 | neuropeptide binding                                                                                                                                                                        |
| GO:0008227 | 11   | 11   | 8.50E-06 | G-protein coupled amine receptor activity                                                                                                                                                   |
| GO:0003774 | 114  | 62   | 1.09E-05 | motor activity                                                                                                                                                                              |
| GO:0005215 | 696  | 293  | 1.37E-05 | transporter activity                                                                                                                                                                        |
| GO:0004222 | 64   | 39   | 1.47E-05 | metalloendopeptidase activity                                                                                                                                                               |
| GO:0005244 | 88   | 50   | 1.58E-05 | voltage-gated ion channel activity                                                                                                                                                          |
| GO:0022832 | 88   | 50   | 1.58E-05 | voltage-gated channel activity                                                                                                                                                              |
| GO:0008188 | 16   | 14   | 1.93E-05 | neuropeptide receptor activity                                                                                                                                                              |
| GO:0046872 | 2761 | 1045 | 1.94E-05 | metal ion binding                                                                                                                                                                           |
| GO:0015293 | 71   | 42   | 1.97E-05 | symporter activity                                                                                                                                                                          |
| GO:0003777 | 65   | 39   | 2.46E-05 | microtubule motor activity                                                                                                                                                                  |
| GO:0043169 | 2788 | 1053 | 2.68E-05 | cation binding                                                                                                                                                                              |
| GO:0043167 | 2795 | 1055 | 2.95E-05 | ion binding                                                                                                                                                                                 |
| GO:0019955 | 57   | 35   | 3.19E-05 | cytokine binding                                                                                                                                                                            |
| GO:0046914 | 1650 | 643  | 3.33E-05 | transition metal ion binding                                                                                                                                                                |
| GO:0008270 | 1483 | 581  | 4.41E-05 | zinc ion binding                                                                                                                                                                            |
| GO:0022892 | 597  | 251  | 6.38E-05 | substrate-specific transporter activity                                                                                                                                                     |
| GO:0001637 | 9    | 9    | 7.11E-05 | G-protein chemoattractant receptor activity                                                                                                                                                 |
| GO:0004950 | 9    | 9    | 7.11E-05 | chemokine receptor activity                                                                                                                                                                 |
| GO:0015291 | 113  | 59   | 8.58E-05 | secondary active transmembrane transporter activity                                                                                                                                         |
| GO:0005267 | 55   | 33   | 1.02E-04 | potassium channel activity                                                                                                                                                                  |
| GO:0001871 | 77   | 43   | 1.06E-04 | pattern binding                                                                                                                                                                             |
| GO:0030247 | 77   | 43   | 1.06E-04 | polysaccharide binding                                                                                                                                                                      |
| GO:0008324 | 313  | 140  | 1.11E-04 | cation transmembrane transporter activity                                                                                                                                                   |
| GO:0003677 | 1667 | 643  | 1.33E-04 | DNA binding                                                                                                                                                                                 |
| GO:0005125 | 60   | 35   | 1.42E-04 | cytokine activity                                                                                                                                                                           |
| GO:0008081 | 56   | 33   | 1.67E-04 | phosphoric diester hydrolase activity                                                                                                                                                       |
| GO:0005201 | 35   | 23   | 1.70E-04 | extracellular matrix structural constituent                                                                                                                                                 |
| GO:0004435 | 16   | 13   | 1.79E-04 | phosphatidylinositol phospholipase C activity                                                                                                                                               |
| GO:0008237 | 113  | 58   | 1.80E-04 | metallopeptidase activity                                                                                                                                                                   |
| GO:0019956 | 11   | 10   | 1.85E-04 | chemokine binding                                                                                                                                                                           |
| GO:0030246 | 186  | 88   | 2.14E-04 | carbohydrate binding                                                                                                                                                                        |
| GO:0004629 | 20   | 15   | 2.68E-04 | phospholipase C activity                                                                                                                                                                    |
| GO:0004867 | 36   | 23   | 3.17E-04 | serine-type endopeptidase inhibitor activity                                                                                                                                                |
| GO:0001664 | 67   | 37   | 4.23E-04 | G-protein-coupled receptor binding                                                                                                                                                          |
| GO:0016709 | 15   | 12   | 4.24E-04 | oxidoreductase activity, acting on paired donors, with incorporation or reduction of molecular oxygen, NADH or NADPH as one donor, and incorporation of one atom of oxygen                  |
| GO:0005509 | 402  | 171  | 4.78E-04 | calcium ion binding                                                                                                                                                                         |
| GO:0016712 | 10   | 9    | 4.90E-04 | oxidoreductase activity, acting on paired donors, with incorporation or reduction of molecular oxygen, reduced flavin or flavoprotein as one donor, and incorporation of one atom of oxygen |
| GO:0042166 | 10   | 9    | 4.90E-04 | acetylcholine binding                                                                                                                                                                       |
| GO:0005539 | 72   | 39   | 5.05E-04 | glycosaminoglycan binding                                                                                                                                                                   |
| GO:0004889 | 7    | 7    | 5.95E-04 | nicotinic acetylcholine-activated cation-selective channel activity                                                                                                                         |
| GO:0008417 | 12   | 10   | 7.64E-04 | fucosyltransferase activity                                                                                                                                                                 |
| GO:0016298 | 53   | 30   | 8.40E-04 | lipase activity                                                                                                                                                                             |
| GO:0005102 | 533  | 219  | 8.49E-04 | receptor binding                                                                                                                                                                            |
| GO:0005342 | 60   | 33   | 9.37E-04 | organic acid transmembrane transporter activity                                                                                                                                             |
| GO:0005272 | 16   | 12   | 1.16E-03 | sodium channel activity                                                                                                                                                                     |
| GO:0004620 | 45   | 26   | 1.22E-03 | phospholipase activity                                                                                                                                                                      |
| GO:0019840 | 18   | 13   | 1.27E-03 | isoprenoid binding                                                                                                                                                                          |
| GO:0008066 | 9    | 8    | 1.28E-03 | glutamate receptor activity                                                                                                                                                                 |
| GO:0015464 | 9    | 8    | 1.28E-03 | acetylcholine receptor activity                                                                                                                                                             |
| GO:0005249 | 43   | 25   | 1.33E-03 | voltage-gated potassium channel activity                                                                                                                                                    |
| GO:0030695 | 355  | 150  | 1.44E-03 | GTPase regulator activity                                                                                                                                                                   |
| GO:0046943 | 59   | 32   | 1.52E-03 | carboxylic acid transmembrane transporter activity                                                                                                                                          |

|            |     |     |          |                                                             |
|------------|-----|-----|----------|-------------------------------------------------------------|
| GO:0004970 | 6   | 6   | 1.72E-03 | ionotropic glutamate receptor activity                      |
| GO:0005234 | 6   | 6   | 1.72E-03 | extracellular-glutamate-gated ion channel activity          |
| GO:0016493 | 6   | 6   | 1.72E-03 | C-C chemokine receptor activity                             |
| GO:0019957 | 6   | 6   | 1.72E-03 | C-C chemokine binding                                       |
| GO:0005083 | 237 | 104 | 1.76E-03 | small GTPase regulator activity                             |
| GO:0005085 | 119 | 57  | 1.82E-03 | guanyl-nucleotide exchange factor activity                  |
| GO:0005516 | 100 | 49  | 2.05E-03 | calmodulin binding                                          |
| GO:0005501 | 17  | 12  | 2.70E-03 | retinoid binding                                            |
| GO:0060589 | 365 | 152 | 2.71E-03 | nucleoside-triphosphatase regulator activity                |
| GO:0004714 | 47  | 26  | 2.85E-03 | transmembrane receptor protein tyrosine kinase activity     |
| GO:0008138 | 36  | 21  | 3.02E-03 | protein tyrosine/serine/threonine phosphatase activity      |
| GO:0061134 | 87  | 43  | 3.04E-03 | peptidase regulator activity                                |
| GO:0070330 | 8   | 7   | 3.32E-03 | aromatase activity                                          |
| GO:0022804 | 221 | 96  | 3.74E-03 | active transmembrane transporter activity                   |
| GO:0046920 | 5   | 5   | 4.97E-03 | alpha(1,3)-fucosyltransferase activity                      |
| GO:0071855 | 5   | 5   | 4.97E-03 | neuropeptide receptor binding                               |
| GO:0005044 | 22  | 14  | 5.14E-03 | scavenger receptor activity                                 |
| GO:0008028 | 12  | 9   | 5.15E-03 | monocarboxylic acid transmembrane transporter activity      |
| GO:0008373 | 12  | 9   | 5.15E-03 | sialyltransferase activity                                  |
| GO:0019825 | 12  | 9   | 5.15E-03 | oxygen binding                                              |
| GO:0030414 | 65  | 33  | 5.25E-03 | peptidase inhibitor activity                                |
| GO:0015020 | 18  | 12  | 5.55E-03 | glucuronosyltransferase activity                            |
| GO:0001071 | 624 | 246 | 5.63E-03 | nucleic acid binding transcription factor activity          |
| GO:0005089 | 56  | 29  | 6.03E-03 | Rho guanyl-nucleotide exchange factor activity              |
| GO:0042578 | 258 | 109 | 6.05E-03 | phosphoric ester hydrolase activity                         |
| GO:0005088 | 68  | 34  | 6.31E-03 | Ras guanyl-nucleotide exchange factor activity              |
| GO:0046906 | 68  | 34  | 6.31E-03 | tetrapyrrole binding                                        |
| GO:0003700 | 623 | 245 | 6.56E-03 | sequence-specific DNA binding transcription factor activity |
| GO:0005275 | 47  | 25  | 6.74E-03 | amine transmembrane transporter activity                    |
| GO:0015081 | 45  | 24  | 7.53E-03 | sodium ion transmembrane transporter activity               |
| GO:0015171 | 43  | 23  | 8.42E-03 | amino acid transmembrane transporter activity               |
| GO:0015245 | 7   | 6   | 8.47E-03 | fatty acid transporter activity                             |
| GO:0015370 | 23  | 14  | 8.98E-03 | solute                                                      |
