# Supplementary material for: Single cell transcriptome analysis of MCF-7 reveals consistently and inconsistently expressed gene groups each associated with distinct cellular localization and functions
Source: PubMed Central journal article supplement (PMC6007910; doi:10.1371/journal.pone.0199471), 2018-06-19
Supplement: pone.0199471.s003.pdf [file pone.0199471.s003.pdf]

**Supplementary Table S3:**  
**Pathway analysis of CE genes using BioCarta pathway database**

| Pathway database: BioCarta            |                   |      |          |                                    |
|---------------------------------------|-------------------|------|----------|------------------------------------|
| Total number gene in BioCarta: 29,200 |                   |      |          |                                    |
| Total number of CE genes: 8,653       |                   |      |          |                                    |
| P-value cutoff: 0.001                 |                   |      |          |                                    |
| # pathway genes                       | # annotated genes | %    | p-value  | pathway name                       |
| 23                                    | 23                | 100% | 0        | <a href="#">MTOR_PATHWAY</a>       |
| 87                                    | 66                | 76%  | 0        | <a href="#">MAPK_PATHWAY</a>       |
| 19                                    | 19                | 100% | 0        | <a href="#">PROTEASOME_PATHWAY</a> |
| 11                                    | 11                | 100% | 0        | <a href="#">EIF2_PATHWAY</a>       |
| 8                                     | 8                 | 100% | 0        | <a href="#">KREB_PATHWAY</a>       |
| 40                                    | 32                | 80%  | 6.23E-12 | <a href="#">P38MAPK_PATHWAY</a>    |
| 24                                    | 22                | 92%  | 1.20E-11 | <a href="#">EIF4_PATHWAY</a>       |
| 37                                    | 30                | 81%  | 1.25E-11 | <a href="#">MET_PATHWAY</a>        |
| 20                                    | 19                | 95%  | 2.69E-11 | <a href="#">IGF1MTOR_PATHWAY</a>   |
| 32                                    | 26                | 81%  | 2.00E-10 | <a href="#">PDGF_PATHWAY</a>       |
| 18                                    | 17                | 94%  | 3.07E-10 | <a href="#">PTEN_PATHWAY</a>       |
| 29                                    | 24                | 83%  | 3.79E-10 | <a href="#">PYK2_PATHWAY</a>       |
| 31                                    | 25                | 81%  | 5.73E-10 | <a href="#">EGF_PATHWAY</a>        |
| 26                                    | 22                | 85%  | 6.65E-10 | <a href="#">RACCYCD_PATHWAY</a>    |
| 26                                    | 22                | 85%  | 6.65E-10 | <a href="#">WNT_PATHWAY</a>        |
| 23                                    | 20                | 87%  | 1.04E-09 | <a href="#">GLEEVEC_PATHWAY</a>    |
| 23                                    | 20                | 87%  | 1.04E-09 | <a href="#">IGF1R_PATHWAY</a>      |
| 20                                    | 18                | 90%  | 1.30E-09 | <a href="#">ACTINY_PATHWAY</a>     |
| 22                                    | 19                | 86%  | 3.20E-09 | <a href="#">CERAMIDE_PATHWAY</a>   |
| 22                                    | 19                | 86%  | 3.20E-09 | <a href="#">IL6_PATHWAY</a>        |
| 16                                    | 15                | 94%  | 3.50E-09 | <a href="#">EIF_PATHWAY</a>        |
| 16                                    | 15                | 94%  | 3.50E-09 | <a href="#">CDC42RAC_PATHWAY</a>   |
| 38                                    | 28                | 74%  | 3.69E-09 | <a href="#">INTEGRIN_PATHWAY</a>   |
| 29                                    | 23                | 79%  | 4.61E-09 | <a href="#">VEGF_PATHWAY</a>       |
| 21                                    | 18                | 86%  | 9.85E-09 | <a href="#">IGF1_PATHWAY</a>       |
| 38                                    | 27                | 71%  | 2.60E-08 | <a href="#">IL2RB_PATHWAY</a>      |
| 44                                    | 30                | 68%  | 2.66E-08 | <a href="#">CHREBP2_PATHWAY</a>    |
| 22                                    | 18                | 82%  | 5.20E-08 | <a href="#">INSULIN_PATHWAY</a>    |

|    |    |     |          |                                       |
|----|----|-----|----------|---------------------------------------|
| 24 | 19 | 79% | 7.61E-08 | <a href="#">TPO PATHWAY</a>           |
| 28 | 21 | 75% | 1.21E-07 | <a href="#">ERK PATHWAY</a>           |
| 34 | 24 | 71% | 1.58E-07 | <a href="#">AT1R_PATHWAY</a>          |
| 23 | 18 | 78% | 2.15E-07 | <a href="#">RAS PATHWAY</a>           |
| 18 | 15 | 83% | 2.79E-07 | <a href="#">ERK5 PATHWAY</a>          |
| 58 | 35 | 60% | 3.06E-07 | <a href="#">PPARA_PATHWAY</a>         |
| 27 | 20 | 74% | 3.23E-07 | <a href="#">GSK3_PATHWAY</a>          |
| 27 | 20 | 74% | 3.23E-07 | <a href="#">CREB_PATHWAY</a>          |
| 39 | 26 | 67% | 3.76E-07 | <a href="#">FCER1_PATHWAY</a>         |
| 35 | 24 | 69% | 3.98E-07 | <a href="#">BCR_PATHWAY</a>           |
| 35 | 24 | 69% | 3.98E-07 | <a href="#">GPCR_PATHWAY</a>          |
| 12 | 11 | 92% | 4.56E-07 | <a href="#">ETC_PATHWAY</a>           |
| 24 | 18 | 75% | 7.44E-07 | <a href="#">CXCR4_PATHWAY</a>         |
| 17 | 14 | 82% | 8.40E-07 | <a href="#">HCMV_PATHWAY</a>          |
| 28 | 20 | 71% | 9.28E-07 | <a href="#">GH_PATHWAY</a>            |
| 34 | 23 | 68% | 9.67E-07 | <a href="#">MPR_PATHWAY</a>           |
| 58 | 34 | 59% | 1.17E-06 | <a href="#">HIVNEF_PATHWAY</a>        |
| 19 | 15 | 79% | 1.28E-06 | <a href="#">EPO_PATHWAY</a>           |
| 19 | 15 | 79% | 1.28E-06 | <a href="#">MAL_PATHWAY</a>           |
| 43 | 27 | 63% | 1.57E-06 | <a href="#">BIOPEPTIDES_PATHWAY</a>   |
| 37 | 24 | 65% | 2.07E-06 | <a href="#">FMLP_PATHWAY</a>          |
| 35 | 23 | 66% | 2.21E-06 | <a href="#">CARM_ER_PATHWAY</a>       |
| 16 | 13 | 81% | 2.51E-06 | <a href="#">BCELLSURVIVAL_PATHWAY</a> |
| 16 | 13 | 81% | 2.51E-06 | <a href="#">CDMAC_PATHWAY</a>         |
| 18 | 14 | 78% | 3.65E-06 | <a href="#">NGF_PATHWAY</a>           |
| 13 | 11 | 85% | 4.31E-06 | <a href="#">P27_PATHWAY</a>           |
| 20 | 15 | 75% | 4.61E-06 | <a href="#">ATM_PATHWAY</a>           |
| 47 | 28 | 60% | 5.11E-06 | <a href="#">TCR_PATHWAY</a>           |
| 10 | 9  | 90% | 5.20E-06 | <a href="#">RANMS_PATHWAY</a>         |
| 22 | 16 | 73% | 5.32E-06 | <a href="#">HER2_PATHWAY</a>          |
| 24 | 17 | 71% | 5.77E-06 | <a href="#">G2_PATHWAY</a>            |
| 24 | 17 | 71% | 5.77E-06 | <a href="#">ECM_PATHWAY</a>           |
| 28 | 19 | 68% | 5.97E-06 | <a href="#">G1_PATHWAY</a>            |
| 15 | 12 | 80% | 7.46E-06 | <a href="#">HIF_PATHWAY</a>           |
| 15 | 12 | 80% | 7.46E-06 | <a href="#">PITX2_PATHWAY</a>         |
| 15 | 12 | 80% | 7.46E-06 | <a href="#">RARRXR_PATHWAY</a>        |
| 19 | 14 | 74% | 1.25E-05 | <a href="#">MTA3_PATHWAY</a>          |

|    |    |     |          |                                        |
|----|----|-----|----------|----------------------------------------|
| 19 | 14 | 74% | 1.25E-05 | <a href="#">TGFB PATHWAY</a>           |
| 12 | 10 | 83% | 1.35E-05 | <a href="#">VDR PATHWAY</a>            |
| 12 | 10 | 83% | 1.35E-05 | <a href="#">RAB PATHWAY</a>            |
| 21 | 15 | 71% | 1.40E-05 | <a href="#">TFF PATHWAY</a>            |
| 23 | 16 | 70% | 1.47E-05 | <a href="#">CTCF PATHWAY</a>           |
| 14 | 11 | 79% | 2.19E-05 | <a href="#">PS1 PATHWAY</a>            |
| 32 | 20 | 62% | 2.71E-05 | <a href="#">RHO PATHWAY</a>            |
| 30 | 19 | 63% | 3.00E-05 | <a href="#">HDAC PATHWAY</a>           |
| 18 | 13 | 72% | 3.37E-05 | <a href="#">ARAP PATHWAY</a>           |
| 18 | 13 | 72% | 3.37E-05 | <a href="#">TEL PATHWAY</a>            |
| 22 | 15 | 68% | 3.71E-05 | <a href="#">CHEMICAL PATHWAY</a>       |
| 46 | 26 | 57% | 3.90E-05 | <a href="#">KERATINOCYTE PATHWAY</a>   |
| 11 | 9  | 82% | 4.18E-05 | <a href="#">P35ALZHEIMERS PATHWAY</a>  |
| 13 | 10 | 77% | 6.39E-05 | <a href="#">CARM1 PATHWAY</a>          |
| 29 | 18 | 62% | 6.83E-05 | <a href="#">TNFR1 PATHWAY</a>          |
| 15 | 11 | 73% | 7.99E-05 | <a href="#">IL3 PATHWAY</a>            |
| 15 | 11 | 73% | 7.99E-05 | <a href="#">AKAPCENTROSOME PATHWAY</a> |
| 25 | 16 | 64% | 8.25E-05 | <a href="#">STRESS PATHWAY</a>         |
| 23 | 15 | 65% | 8.83E-05 | <a href="#">P53HYPOXIA PATHWAY</a>     |
| 23 | 15 | 65% | 8.83E-05 | <a href="#">PTDINS PATHWAY</a>         |
| 17 | 12 | 71% | 8.92E-05 | <a href="#">ARF PATHWAY</a>            |
| 21 | 14 | 67% | 9.22E-05 | <a href="#">MEF2D PATHWAY</a>          |
| 21 | 14 | 67% | 9.22E-05 | <a href="#">ATRBRCA PATHWAY</a>        |
| 10 | 8  | 80% | 1.29E-04 | <a href="#">RNA PATHWAY</a>            |
| 10 | 8  | 80% | 1.29E-04 | <a href="#">GLYCOLYSIS PATHWAY</a>     |
| 37 | 21 | 57% | 1.55E-04 | <a href="#">PAR1 PATHWAY</a>           |
| 26 | 16 | 62% | 1.73E-04 | <a href="#">BAD PATHWAY</a>            |
| 12 | 9  | 75% | 1.84E-04 | <a href="#">BARR MAPK PATHWAY</a>      |
| 12 | 9  | 75% | 1.84E-04 | <a href="#">TRKA PATHWAY</a>           |
| 24 | 15 | 62% | 1.92E-04 | <a href="#">NTHI PATHWAY</a>           |
| 22 | 14 | 64% | 2.10E-04 | <a href="#">IL2 PATHWAY</a>            |
| 16 | 11 | 69% | 2.33E-04 | <a href="#">RELA PATHWAY</a>           |
| 18 | 12 | 67% | 2.34E-04 | <a href="#">ETS PATHWAY</a>            |
| 27 | 16 | 59% | 3.37E-04 | <a href="#">VIP PATHWAY</a>            |
| 27 | 16 | 59% | 3.37E-04 | <a href="#">EDG1 PATHWAY</a>           |
| 21 | 13 | 62% | 4.90E-04 | <a href="#">MITOCHONDRIA PATHWAY</a>   |
| 54 | 27 | 50% | 5.08E-04 | <a href="#">NFAT PATHWAY</a>           |

|    |    |     |          |                                       |
|----|----|-----|----------|---------------------------------------|
| 11 | 8  | 73% | 5.21E-04 | <a href="#">EPONFKB PATHWAY</a>       |
| 11 | 8  | 73% | 5.21E-04 | <a href="#">CDK5 PATHWAY</a>          |
| 30 | 17 | 57% | 5.28E-04 | <a href="#">FAS PATHWAY</a>           |
| 19 | 12 | 63% | 5.39E-04 | <a href="#">CALCINEURIN PATHWAY</a>   |
| 13 | 9  | 69% | 5.83E-04 | <a href="#">ARENRF2 PATHWAY</a>       |
| 13 | 9  | 69% | 5.83E-04 | <a href="#">RB PATHWAY</a>            |
| 15 | 10 | 67% | 5.96E-04 | <a href="#">BARRESTIN SRC PATHWAY</a> |
| 15 | 10 | 67% | 5.96E-04 | <a href="#">LONGEVITY PATHWAY</a>     |
| 31 | 17 | 55% | 9.11E-04 | <a href="#">MYOSIN PATHWAY</a>        |
| 22 | 13 | 59% | 9.81E-04 | <a href="#">AKT PATHWAY</a>           |
| 20 | 12 | 60% | 1.12E-03 | <a href="#">GCR PATHWAY</a>           |
| 20 | 12 | 60% | 1.12E-03 | <a href="#">NKCELLS PATHWAY</a>       |
| 18 | 11 | 61% | 1.26E-03 | <a href="#">TNFR2 PATHWAY</a>         |
| 18 | 11 | 61% | 1.26E-03 | <a href="#">UCALPAIN PATHWAY</a>      |
| 16 | 10 | 62% | 1.40E-03 | <a href="#">P53 PATHWAY</a>           |
| 10 | 7  | 70% | 1.45E-03 | <a href="#">DNAFRAGMENT PATHWAY</a>   |
| 10 | 7  | 70% | 1.45E-03 | <a href="#">SKP2E2F PATHWAY</a>       |
